# Supplementary material for: Synthesis of cobalt tetra-2,3-pyridiniumporphyrazinato with sulfonic acid tags as an efficient catalyst and its application for the synthesis of bicyclic ortho-aminocarbonitriles, cyclohexa-1,3-dienamines and 2-amino-3-cyanopyridines
Source: Royal Society of Chemistry journal article supplement (doi:10.1039/d0ra02172e), 2020-01-01

## Supplementary data

### **Synthesis of cobalt tetra-2,3-pyridiniumporphyrinato with sulfonic acid tags as an efficient catalyst and its application for the synthesis of bicyclic *ortho*-aminocarbonitriles, cyclohexa-1,3-dienamines and 2-amino-3-cyanopyridines**

Mohammad Dashteh,<sup>a</sup> Mohammad Ali Zolfigol,<sup>a\*</sup> Ardeshir Khazaei,<sup>a\*</sup> Saeed Baghery,<sup>a\*</sup> Meysam Yarie,<sup>a</sup> Sajjad Makhdoomi,<sup>b</sup> Maliheh Safaiee<sup>c\*</sup>

<sup>a</sup> Department of Organic Chemistry, Faculty of Chemistry, Bu-Ali Sina University, Hamedan 6517838683, Iran

<sup>b</sup> Department of Pharmacology and Toxicology, School of Pharmacy, Hamedan University of Medicinal Science, Hamedan, Iran

<sup>c</sup> Department of Medicinal Plants Production, University of Nahavand, Nahavand, 6593139565, Iran

Fax: +988133493009; E-mail: zolfi@basu.ac.ir and mzolfigol@yahoo.com (M.A. Zolfigol); Khazaei\_1326@yahoo.com (A. Khazaei); saadybaghery@yahoo.com (S. Baghery); azalia\_s@yahoo.com (M. Safaiee).

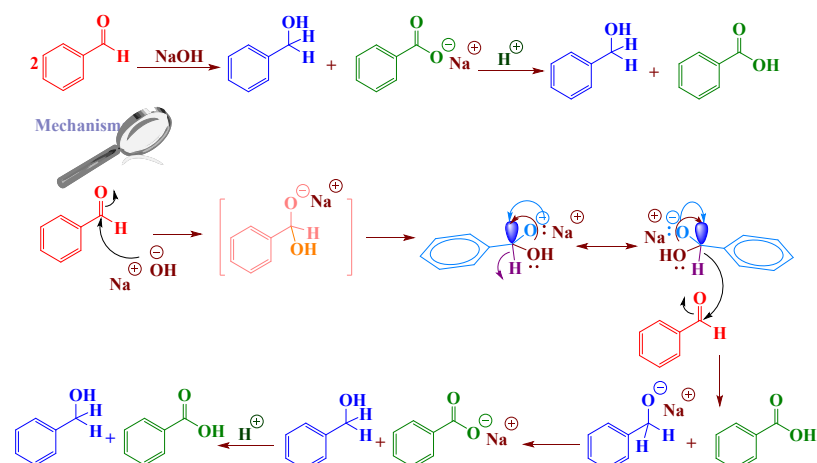

**Scheme S1.** Suggested mechanism for the in-situ oxidation-reduction Cannizzaro reaction by an uncommon hydride transfer *via* ABO mechanism.

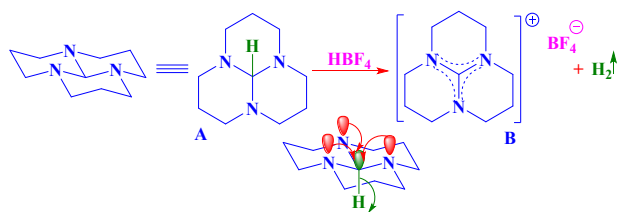

**Scheme S2.** Unusual hydride transfers from tricyclic orthoamide (A) by ABO mechanism.

### ***General information***

The M.p. was determined by Thermo Scientific apparatus. The  $^1\text{H}$  (300 and 400 MHz) and  $^{13}\text{C}$  NMR (75 and 100 MHz) spectra were analyzed by Bruker DRX-400 MHz instrument using TMS as internal standard and DMSO- $d_6$  as a solvent. FT-IR spectra were analyzed by Perkin-Elmer FT-IR-17259 instrument by KBr disks. Elemental analyses were achieved on a Perkin Elmer 2400 Series II Elemental CHNS analyzer. All the chemicals were purchased from Sigma-Aldrich or Merck and used without further purification. Silica gel plates (Merck) were used for TLC analysis with a mixture of *n*-hexane and ethyl acetate (5:2) as the eluent. Ultraviolet-visible spectra were analyzed by a Perkin-Elmer UV-Vis and DRS Spectrophotometer 35. ICP-MS was performed on an Agilent 7700x apparatus. Elemental compositions were determined with a ZEISS SIGMA VP-500 scanning electron microscope equipped with an X-ray detector Oxford Instrument for microanalysis (SEM-EDX) presenting a 133 eV resolution at 20 kV. TGA and DTA were achieved on a Rheometric Scientific STA 1500 (heating rate of 10  $^\circ\text{C min}^{-1}$  up to 600  $^\circ\text{C}$ ; under a nitrogen atmosphere at 25  $^\circ\text{C}$ ). XRD was achieved on an analytical X' Pert Pro apparatus with Cu  $K\alpha$  ( $\lambda = 0.154$  nm) radiation. Solvents were dried, distilled and stored over molecular sieves. Centrifugation method was carried out in an Anke TDL80-2B. FE-SEM images were performed by a Zigma. TEM images were carried out by a Zeiss-EM10C-100 KV.

### ***Selected spectral data analysis for compounds***

***2-Amino-4a,5,6,7-tetrahydro-4-phenylnaphthalene-1,3,3(4H)-tricarbonitrile (6a)***: M.p.: 255-256  $^\circ\text{C}$ ; IR (KBr)  $\nu$ : 3480, 3424, 3366, 3219, 3153, 2205, 1675, 1625, 1539, 1324, 776  $\text{cm}^{-1}$ ;  $^1\text{H}$  NMR (300 MHz, DMSO- $d_6$ ) ( $\delta$ , ppm): 0.84-0.90 (m, 1H), 1.45-1.48 (m, 2H), 1.67-1.73 (m, 1H), 2.02-2.08 (m, 1H), 2.17-2.21 (m, 1H), 2.73-2.89 (m, 1H), 3.53 (d,  $J = 12.0$  Hz, 1H), 5.73 (s, 1H), 7.35 (s, 2H), 7.43-7.59 (m, 5H);  $^{13}\text{C}$  NMR (75 MHz, DMSO- $d_6$ ) ( $\delta$ , ppm): 135.1, 129.4, 129.3, 129.0, 120.8, 116.6, 113.0, 112.8, 82.0, 51.0, 43.3, 34.3, 27.4, 25.3, 21.4.

***2-Amino-4-(4-nitrophenyl)-4a,5,6,7-tetrahydronaphthalene-1,3,3(4H)-tricarbonitrile (6c)***: Yellow solid; Yield: 93%; M.p.: 264-265  $^\circ\text{C}$ ; IR (KBr)  $\nu$  ( $\text{cm}^{-1}$ ): 3424.72, 3339.7, 3058.4, 2191.41, 1666.68, 1631.6, 1596.91, 1525.48, 1348.66, 736.35;  $^1\text{H}$  NMR (400 MHz, DMSO- $d_6$ ) ( $\delta$ , ppm): 0.81-0.88 (m, 1H,  $-\text{CH}_2$ ), 1.43-1.52 (m, 2H,  $-\text{CH}_2$ ), 1.66-1.69 (m, 1H,  $-\text{CH}_2$ ), 2.04-2.05 (m, 2H,  $-\text{CH}_2$ ), 2.15-2.71 (m, 1H,  $-\text{CH}_2$ ), 3.38 (d,  $J = 12.0$  Hz, 1H,  $-\text{CH}$ ), 5.70 (s, 1H,  $=\text{CH}$ ), 6.71-6.86 (dd, 2H,  $J = 8.0$  Hz), 7.19-7.21 (d, 1H,  $J = 8.0$  Hz), 7.33 (s, 2H,  $-\text{NH}_2$ ), 7.35-7.38 (d, 1H,  $J =$

8.0 Hz, Ar-H) ;  $^{13}\text{C}$  NMR (100 MHz, DMSO- $d_6$ ):  $\delta$  157.7, 143.6, 129.0, 124.5, 120.0, 116.1, 114.9, 112.6, 112.5, 81.4, 50.0, 43.2, 33.8, 26.9, 24.8, 21.0.

**2-Amino-4-(4-chlorophenyl)-4a,5,6,7-tetrahydronaphthalene-1,3,3(4H)-tricarbonitrile (6e):** M.p.: 250-251 °C; IR (KBr)  $\nu$ : 3434, 3360, 3308, 3168, 3129, 2185, 1659, 1633, 1522, 1482, 1371, 1153, 762  $\text{cm}^{-1}$ ;  $^1\text{H}$  NMR (400 MHz, DMSO- $d_6$ ) ( $\delta$ , ppm): 0.80-0.89 (m, 1H), 1.43-1.46 (m, 2H), 1.63-1.66 (m, 1H), 2.05-2.20 (m, 2H), 2.72-2.79 (m, 1H), 3.60 (d,  $J$  = 12.4 Hz, 1H), 5.72 (s, 1H), 7.26 (d,  $J$  = 8.0 Hz, 1H), 7.28-7.37 (m, 3H), 7.48-7.64 (m, 2H);  $^{13}\text{C}$  NMR (100 MHz, DMSO- $d_6$ ) ( $\delta$ , ppm): 143.3, 134.7, 134.4, 134.2, 129.5, 129.3, 129.2, 129.0, 128.0, 121.0, 116.7, 112.9, 112.8, 82.2, 50.2, 43.2, 34.3, 27.5, 25.4, 21.5.

**2-Amino-4-(2-chlorophenyl)-4a,5,6,7-tetrahydronaphthalene-1,3,3(4H)-tricarbonitrile (6f):** M.p.: 270-271 °C; IR (KBr)  $\nu$ : 3448, 3358, 2949, 2920, 2217, 1633, 1619, 1595, 1270, 1042, 814, 777, 749, 702  $\text{cm}^{-1}$ ;  $^1\text{H}$  NMR (400 MHz, DMSO- $d_6$ ) ( $\delta$ , ppm): 0.78-0.87 (m, 1H), 1.36-1.46 (m, 2H), 1.66-1.69 (m, 1H), 2.04-2.21 (m, 2H), 2.86-2.89 (m, 1H), 3.89 (d,  $J$  = 12.0 Hz, 1H), 5.77 (s, 1H), 7.42 (s, 2H), 7.48-7.54 (m, 2H), 7.63 (d,  $J$  = 8.0 Hz, 1H), 7.77 (d,  $J$  = 8.0 Hz, 1H);  $^{13}\text{C}$  NMR (100 MHz, DMSO- $d_6$ ) ( $\delta$ , ppm): 143.4, 135.1, 131.8, 130.6, 130.1, 129.1, 128.4, 127.8, 120.9, 115.9, 112.2, 111.5, 81.5, 46.5, 41.6, 34.5, 26.7, 24.7, 20.8.

**2-Amino-4-(2,4-dichlorophenyl)-4a,5,6,7-tetrahydronaphthalene-1,3,3(4H)-tricarbonitrile (6g):** Pale Yellow solid; Yield: 92%; M.p.: 260 °C; IR (KBr)  $\nu$  ( $\text{cm}^{-1}$ ): 3411.5, 3334, 3202, 3069.9, 2190.42, 1661.6, 1651.78, 1521.16, 1467.97, 1398.99, 994.07;  $^1\text{H}$  NMR (400 MHz, DMSO- $d_6$ ) ( $\delta$ , ppm): 0.83-0.95 (m, 1H,  $-\text{CH}_2$ ), 1.52-1.56 (m, 2H,  $-\text{CH}_2$ ), 1.69-1.71 (m, 1H,  $-\text{CH}_2$ ), 2.02-2.23 (m, 2H,  $-\text{CH}_2$ ), 2.72-2.87 (m, 1H,  $-\text{CH}_2$ ), 3.42-3.49 (d,  $J$  = 12.0 Hz, 1H,  $-\text{CH}$ ), 5.74 (s, 1H,  $=\text{CH}$ ), 6.99 (s, 1H, Ar-H), 7.11-7.16 (dd, 2H,  $J$  = 8.0 Hz, Ar-H), 7.36 (s, 2H,  $-\text{NH}_2$ );  $^{13}\text{C}$  NMR (100 MHz, DMSO- $d_6$ ):  $\delta$  149.8, 149.4, 149.2, 148.5, 144.1, 144.4, 129.4, 127.3, 127.0, 125.1, 120.6, 119.7, 166.8, 113.4, 113.1, 112.9, 112.3, 111.7, 82.0, 56.1, 55.93, 51.1, 50.5, 43.7, 43.4, 34.7, 34.4, 27.4, 25.3, 21.5.

**2-Amino-4-(4-bromophenyl)-4a,5,6,7-tetrahydronaphthalene-1,3,3(4H)-tricarbonitrile (6j):** Yellow solid; Yield: 74%; M.p.: 270-272 °C; IR (KBr)  $\nu$  ( $\text{cm}^{-1}$ ): 3428.7, 3336.81, 3259.3, 3179, 2205.77, 1665.87, 1634.70, 1591.63, 1526.61, 1405.36, 1248.61, 1198.62, 784.68, 715.35;  $^1\text{H}$  NMR (400 MHz, DMSO- $d_6$ ) ( $\delta$ , ppm): 0.80-0.90 (m, 1H,  $-\text{CH}_2$ ), 1.44-1.47 (m, 2H,  $-\text{CH}_2$ ), 1.67-1.68 (m, 1H,  $-\text{CH}_2$ ), 2.06-2.21 (m, 2H,  $-\text{CH}_2$ ), 2.50-2.80 (m, 1H,  $-\text{CH}_2$ ), 3.61-3.64 (d,  $J$  = 12.0 Hz, 1H,  $-\text{CH}$ ), 5.73 (s, 1H,  $=\text{CH}$ ), 7.27-7.31 (dd, 2H,  $J$  = 8.0 Hz), 7.33 (s, 2H,  $-\text{NH}_2$ ), 7.49

(d, 1H, J = 8.0 Hz, Ar-H), 7.65 (d, 1H, J = 8.0 Hz, Ar-H); <sup>13</sup>C NMR (100 MHz, DMSO-d<sub>6</sub>): δ 157.7, 143.7, 130.0, 128.0, 122.1, 120.5, 120.5, 116.0, 112.5, 111.7, 81.4, 55.7, 42.2, 33.8, 26.7, 24.7, 20.8.

**2-Amino-4-(2-bromophenyl)-4a,5,6,7-tetrahydronaphthalene-1,3,3(4H)-tricarbonitrile (6l):** Yellow solid; Yield: 77%; M.p.: 250-251 °C; IR (KBr) ν (cm<sup>-1</sup>): 3417, 3305, 3141, 2946, 2214, 1647, 1554, 1520, 1400 ; <sup>1</sup>H NMR (300 MHz, DMSO-d<sub>6</sub>) (δ, ppm): 0.82-0.94 (m, 1H), 1.46-1.50 (m, 2H), 1.68-1.73 (m, 1H), 2.08-2.11 (m, 1H), 2.20-2.25 (m, 1H), 2.79-2.86 (m, 1H), 3.63-3.67 (d, J = 12.0 Hz, 1H), 5.76 (s, 1H), 7.32 (s, 2H), 7.40-7.67 (m, 4H); <sup>13</sup>C NMR (75 MHz, DMSO-d<sub>6</sub>) (δ, ppm): 164.4, 161.2, 143.9, 134.9, 131.4, 129.2, 120.9, 116.6, 112.9, 112.8, 82.1, 34.3, 27.4, 25.3, 21.4.

**2-Amino-4a,5,6,7-tetrahydro-4-p-tolynaphthalene-1,3,3(4H)-tricarbonitrile (6m):** M.p.: 236-238 °C; IR (KBr) ν: 3478, 3424, 3366, 3158, 2205, 1674, 1624, 1557, 1540, 818, 777 cm<sup>-1</sup>; <sup>1</sup>H NMR (300 MHz, DMSO-d<sub>6</sub>) (δ, ppm): 0.79-0.88 (m, 1H), 1.47-1.50 (m, 2H), 1.66-1.68 (m, 1H), 2.00-2.06 (m, 1H), 2.16-2.21 (m, 1H), 2.34 (s, 3H), 2.75-2.80 (m, 1H), 3.48 (d, J = 12.0 Hz, 1H), 5.71 (s, 1H), 7.23 (s, 1H), 7.29 (s, 1H), 7.37 (s, 2H), 7.46 (s, 1H); <sup>13</sup>C NMR (75 MHz, DMSO-d<sub>6</sub>) (δ, ppm): 144.0, 138.7, 132.7, 132.0, 129.7, 129.3, 127.2, 120.7, 116.6, 113.0, 112.8, 82.0, 50.7, 43.4, 34.3, 27.4, 25.3, 21.4, 21.2.

**2-Amino-4-(4-methoxyphenyl)-4a,5,6,7-tetrahydronaphthalene-1,3,3(4H)-tricarbonitrile (6n):** Yellow solid; Yield: 89%; M.p.: 260-261 °C; IR (KBr) ν (cm<sup>-1</sup>): 3409.01, 3333.09, 3218.48, 2968.08, 2199.66, 1683.85, 1660.55, 1622.00, 1469.13, 1374.02, 1215.83, 994.69, 847.31, 782.78; <sup>1</sup>H NMR (400 MHz, DMSO-d<sub>6</sub>) (δ, ppm): 0.75-0.82 (m, 1H, -CH<sub>2</sub>), 1.48-1.52 (m, 2H, -CH<sub>2</sub>), 1.65-1.68 (m, 1H, -CH<sub>2</sub>), 2.08-2.16 (m, 2H, -CH<sub>2</sub>), 2.73-2.80 (m, 1H, -CH<sub>2</sub>), 3.75 (s, 3H, -CH<sub>3</sub>), 3.84-3.87 (d, J = 12.0 Hz, 1H, -CH), 5.73 (s, 1H, =CH), 7.08-7.15 (dd, 2H, J = 8.0 Hz, Ar-H), 7.34 (s, 2H, -NH<sub>2</sub>), 7.39-7.54 (dd, 2H, J = 8.0 Hz, Ar-H) ; <sup>13</sup>C NMR (100 MHz, DMSO-d<sub>6</sub>): δ 157.7, 143.7, 130.0, 128.9, 128.8, 128.0, 122.1, 120.6, 120.5, 120.5, 116.0, 112.5, 111.9, 111.7, 81.4, 55.7, 42.2, 33.8, 26.7, 24.7, 20.8.

**2-Amino-4a,5,6,7-tetrahydro-4-(3,4-dimethoxyphenyl)naphthalene-1,3,3(4H)-tricarbonitrile (6p):** M.p.: 289-291 °C; IR (KBr) ν: 3433, 3335, 2939, 2864, 2212, 1649, 1519, 1264, 1021, 823, 766, 419 cm<sup>-1</sup>; <sup>1</sup>H NMR (500 MHz, DMSO-d<sub>6</sub>) (δ, ppm): 0.86-0.88 (m, 1H), 1.50-1.53 (m, 2H), 1.67-1.69 (m, 1H), 1.99-2.20 (m, 2H), 2.73-2.82 (m, 1H), 3.33-3.46 (t, J = 12.0 Hz, 1H), 3.73-3.78 (d, 6H), 5.71 (s, 1H), 6.96 (s, 1H), 7.08-7.14 (m, 2H), 7.34 (s, 2H); <sup>13</sup>C NMR

(125 MHz, DMSO- $d_6$ ):  $\delta$  162.2, 143.5, 128.9, 126.9, 124.7, 120.3, 119.2, 116.2, 112.5, 111.9, 111.3, 110.3, 81.6, 55.6, 50.8, 50.4, 43.1, 35.7, 30.7, 26.9, 24.9, 21.0.

**2-Amino-4-(4-methoxyphenyl)-5,6,7,8-tetrahydroquinoline-3-carbonitrile (8b):** Cream solid; Yield: 75%; M.p : 232-233 °C; IR (KBr) v: 3420.09, 3340.63, 3254.93, 2961.92, 2935.82, 2830.19, 2210.74, 1650.58, 1601.48, 1454.49, 1392.88, 714.02  $\text{cm}^{-1}$ ;  $^1\text{H}$  NMR (500 MHz, DMSO- $d_6$ ) ( $\delta$ , ppm): 1.62-1.63 (m, 2H,  $-\text{CH}_2$ ), 1.75-1.76 (m, 2H,  $-\text{CH}_2$ ), 2.18-2.21 (br s, 2H,  $-\text{CH}_2$ ), 2.72-2.74 (2H, br s,  $\text{CH}_2$ ), 3.78 (s, 3H,  $-\text{CH}_3$ ), 6.73 (s, 2H,  $-\text{NH}_2$ ), 7.65-7.67 (d, 2H, Ar-H), 8.36-8.39 (d, 2H, Ar-H) ;  $^{13}\text{C}$  NMR (125 MHz, DMSO- $d_6$ ): 161.9, 158.3, 152.2, 148.0, 143.6, 130.4, 124.2, 118.3, 116.7, 87.6, 55.5, 33.3, 31.1, 26.1, 22.8, 22.4.

**2-Amino-4-(4-chlorophenyl)-5,6,7,8-tetrahydroquinoline-3-carbonitrile (8e):** M.p.: 256-257 °C; IR (KBr) v: 3421.01, 3343.82, 3253.01, 2948.35, 2833.26, 2212.72, 1645.85, 16.02.96, 1094.80  $\text{cm}^{-1}$ ;  $^1\text{H}$  NMR (500 MHz, DMSO- $d_6$ ) ( $\delta$ , ppm): 1.61-1.75 (4H, m,  $\text{CH}_2$ ), 2.18-2.20 (2H, brs,  $\text{CH}_2$ ), 2.72-2.74 (2H, brs,  $\text{CH}_2$ ), 6.72 (2H, s,  $\text{NH}_2$ ), 7.64-7.66 (2H, d, ArH), 8.35-8.37 (2H, d, ArH);  $^{13}\text{C}$  NMR (125 MHz, DMSO- $d_6$ ): 161.9, 158.3, 152.2, 148.0, 143.6, 130.4, 124.2, 118.3, 116.7, 87.6, 33.3, 26.1, 22.8, 22.4.

**2-Amino-4-(thiophen-2-yl)-5,6,7,8-tetrahydroquinoline-3-carbonitrile (8f):** Cream solid; Yield: 75%; M.p : 232-233 °C ; IR (KBr) v: 3422.34, 3337.37, 3251.70, 2948.34, 2828.88, 2213.12, 1647.99, 1600.21, 1211.94, 829  $\text{cm}^{-1}$ ;  $^1\text{H}$  NMR (500 MHz, DMSO- $d_6$ ) ( $\delta$ , ppm): 1.59-1.63 (m, 2H,  $-\text{CH}_2$ ), 1.74-1.78 (m, 2H,  $-\text{CH}_2$ ), 2.20-2.24 (br s, 2H,  $-\text{CH}_2$ ), 2.70-2.75 (2H, br s,  $\text{CH}_2$ ), 6.60 (s, 2H,  $-\text{NH}_2$ ), 7.35-7.39 (m, 3H, Ar-H) ;  $^{13}\text{C}$  NMR (125 MHz, DMSO- $d_6$ ): 161.5, 153.3, 133.1, 130.8, 118.9, 117.0, 116.1, 115.9, 88.5, 33.3, 31.1, 26.2, 22.9, 22.5.

# **FT-IR, $^1\text{H}$ NMR and $^{13}\text{C}$ NMR spectra**

**Fig. S1.** FT-IR spectrum of 2-amino-4a,5,6,7-tetrahydro-4-phenylnaphthalene-1,3,3(4H)-tricarbonitrile (6a)

Analyst  
Date

Khorshidi  
Monday, April 29, 2019 10:34 PM

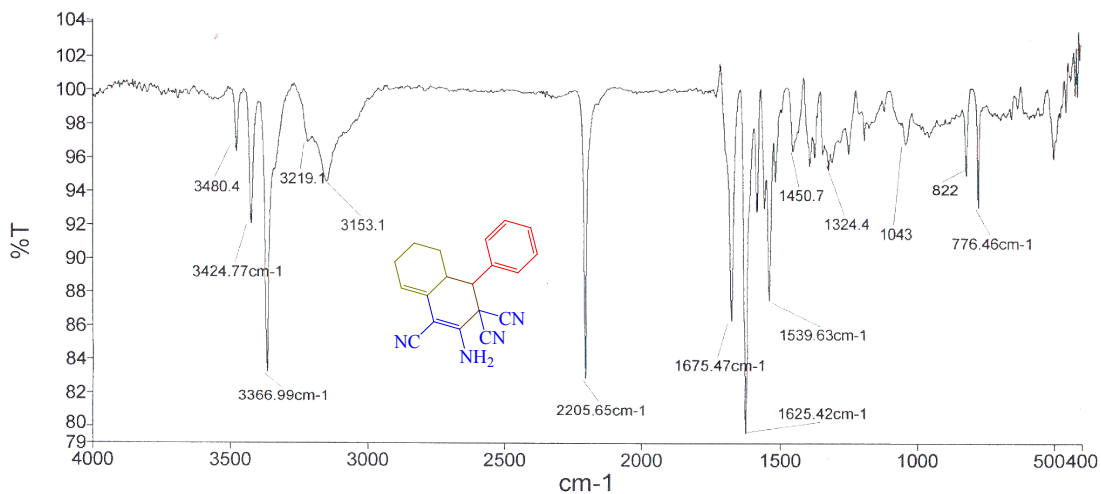

**Fig. S2.** <sup>1</sup>H NMR spectrum of 2-amino-4a,5,6,7-tetrahydro-4-phenylnaphthalene-1,3,3(4H)-tricarbonitrile (6a)

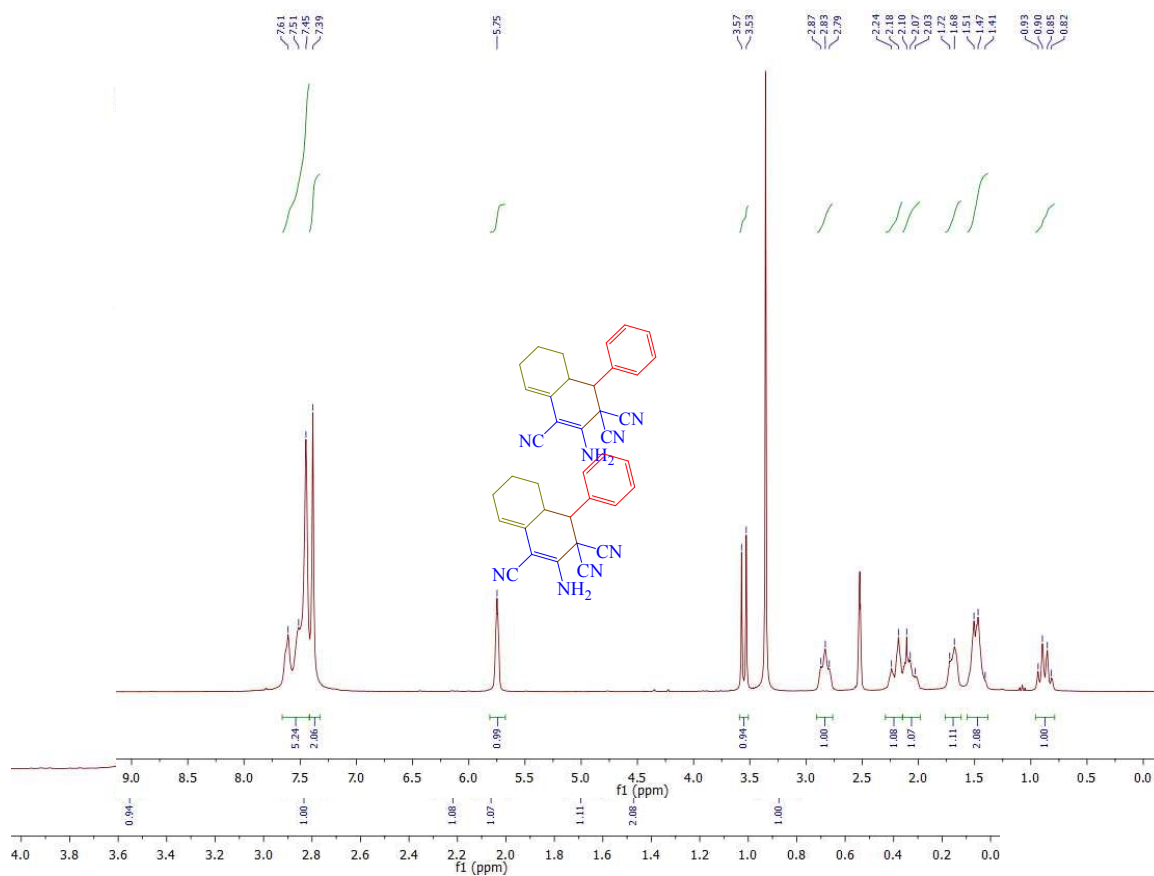



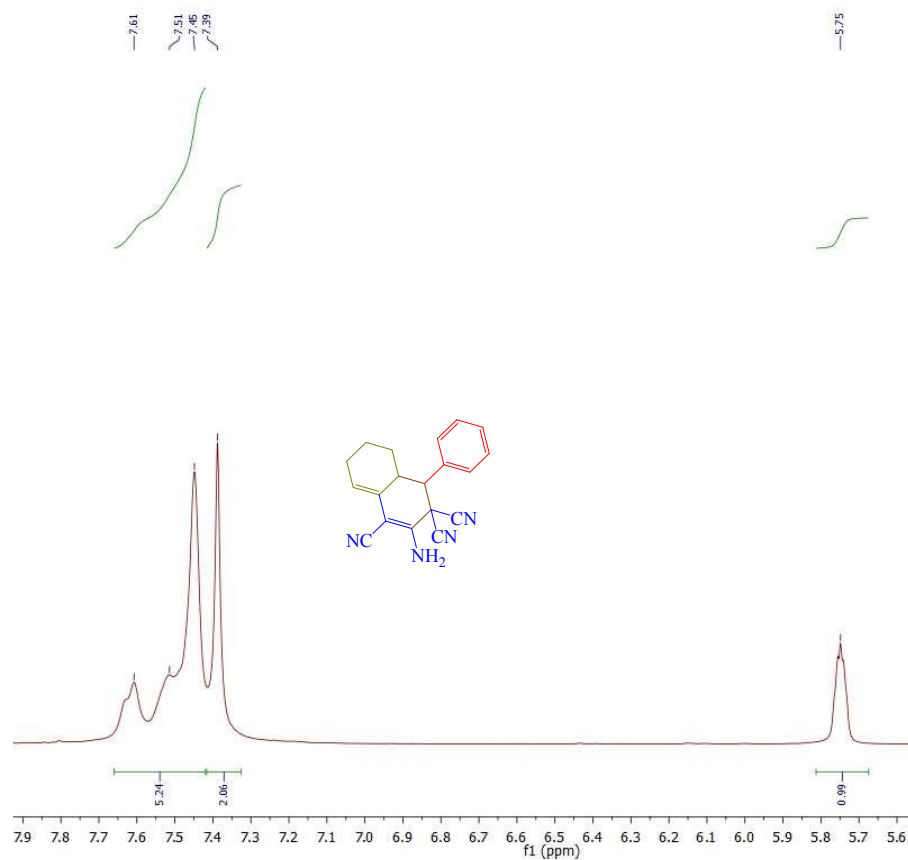

**Fig. S3.**  $^{13}\text{C}$  NMR spectrum of 2-amino-4a,5,6,7-tetrahydro-4-phenylnaphthalene-1,3,3(4H)-tricarbonitrile (6a)

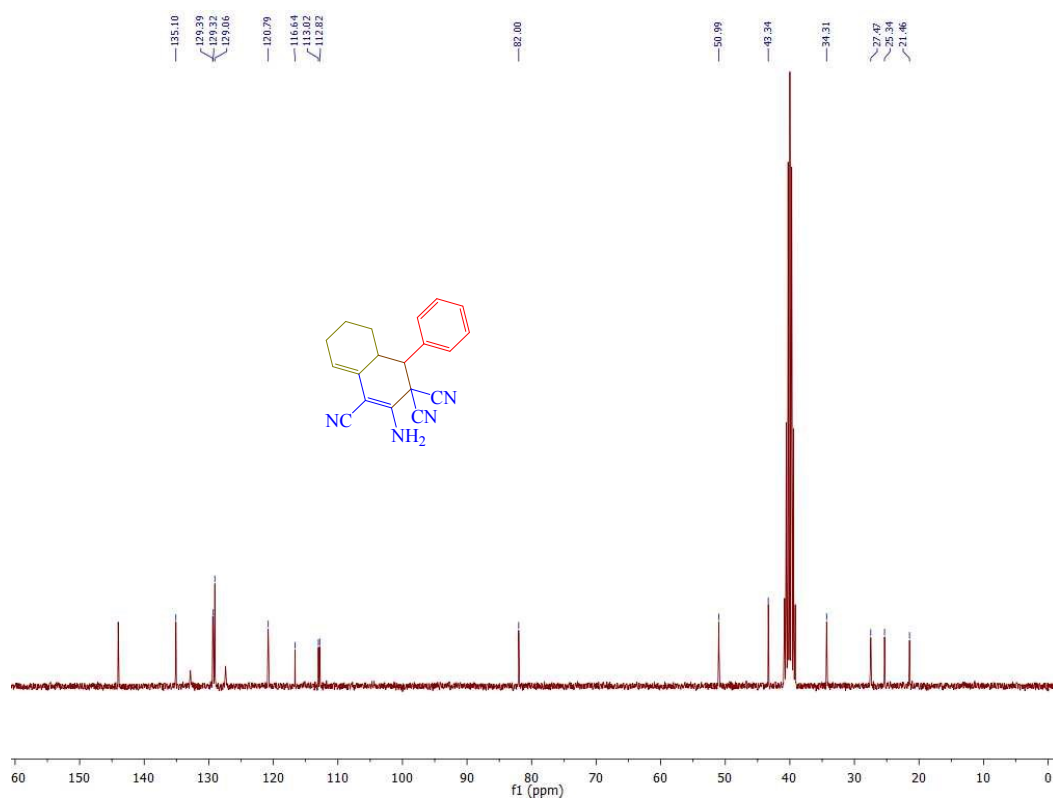

Fig. S4. FT-IR spectrum of 2-amino-4-(4-nitrophenyl)-4a,5,6,7-tetrahydronaphthalene-1,3,3(4H)-tricarbonitrile (6c)

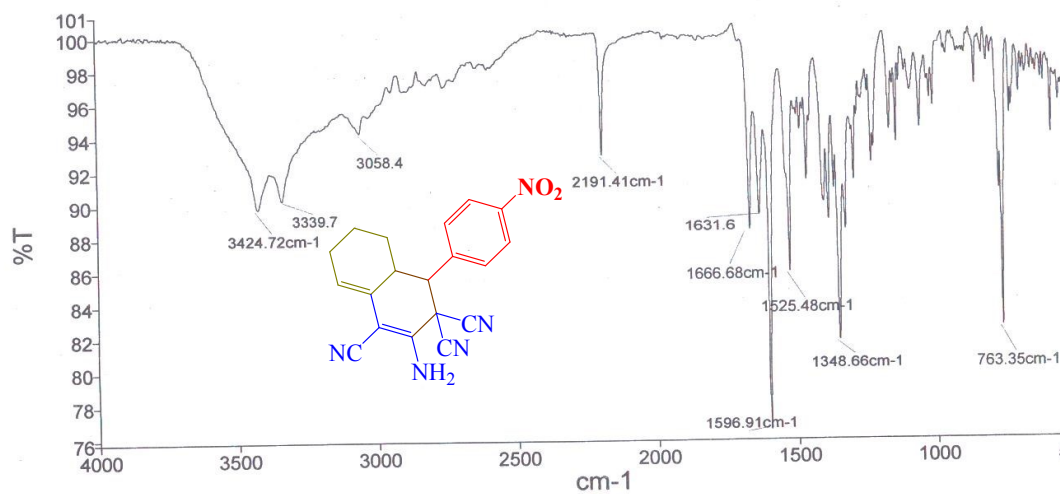

Fig. S5. <sup>1</sup>H NMR spectrum of 2-amino-4-(4-nitrophenyl)-4a,5,6,7-tetrahydronaphthalene-1,3,3(4H)-tricarbonitrile (6c)

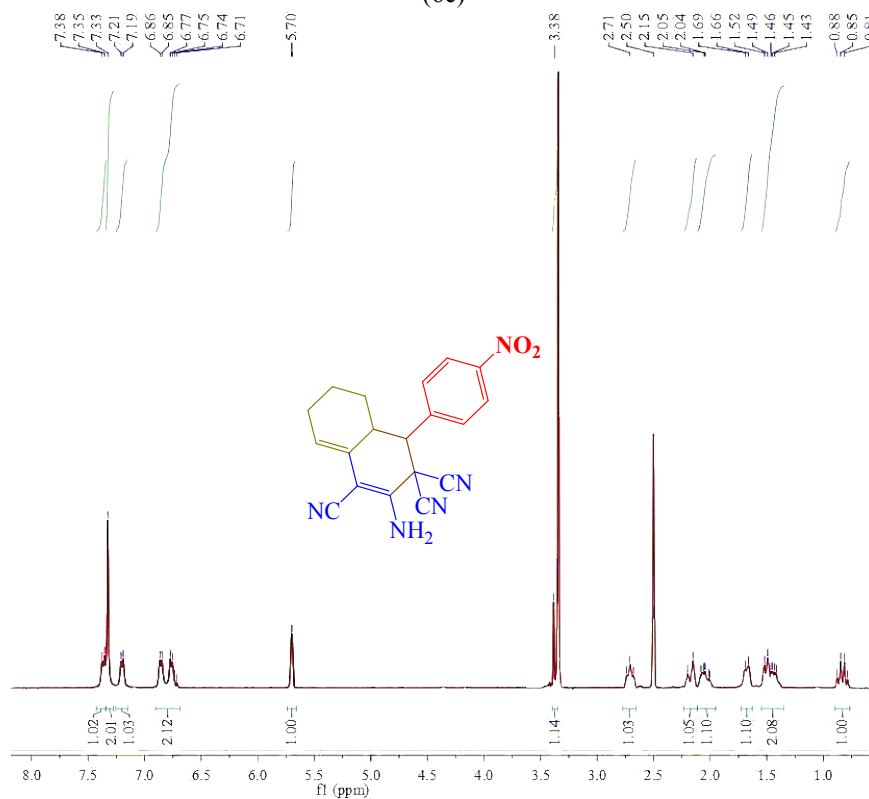

**Fig. S6.**  $^{13}\text{C}$  NMR spectrum of 2-amino-4-(4-nitrophenyl)-4a,5,6,7-tetrahydronaphthalene-1,3,3(4*H*)-tricarbonitrile (6c)

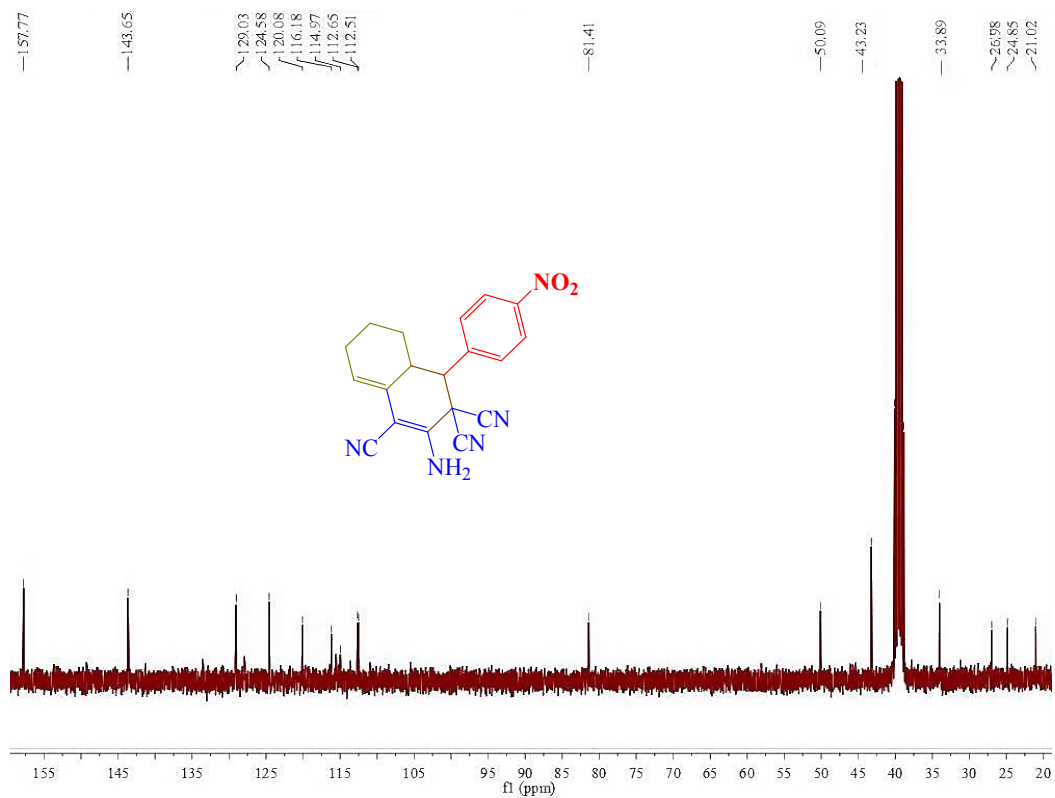

**Fig. S7.** FT-IR spectrum of 2-amino-4-(4-chlorophenyl)-4a,5,6,7-tetrahydronaphthalene-1,3,3(4*H*)-tricarbonitrile (6e)

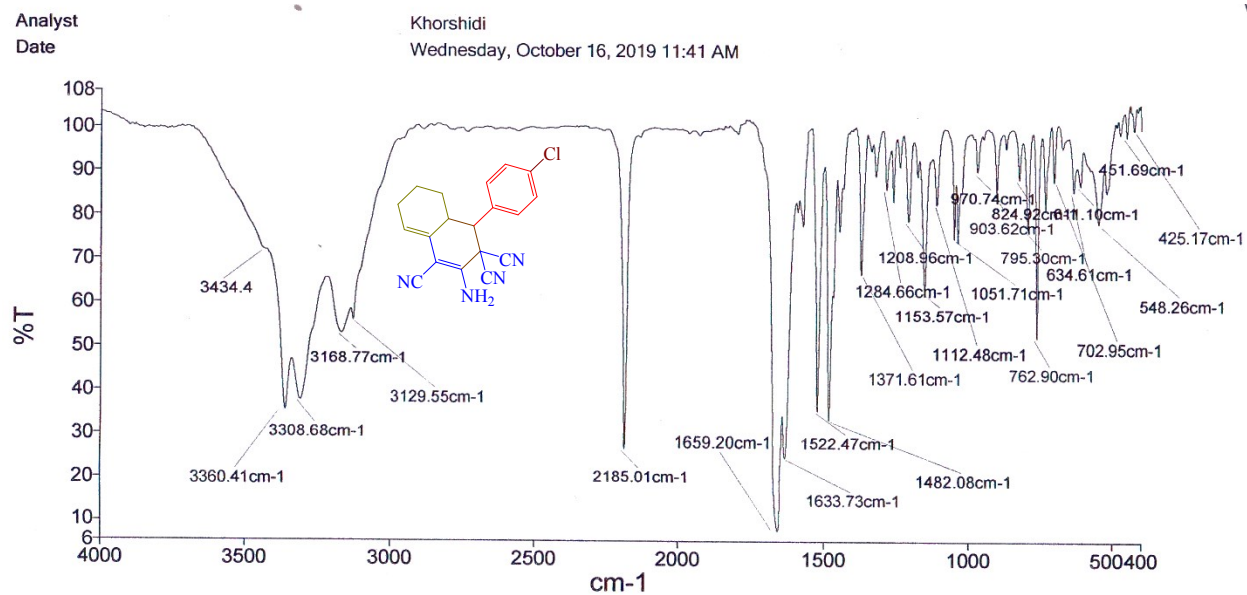

**Fig. S8.** <sup>1</sup>H NMR spectrum of 2-amino-4-(4-chlorophenyl)-4a,5,6,7-tetrahydronaphthalene-1,3,3(4*H*)-tricarbonitrile (6e)

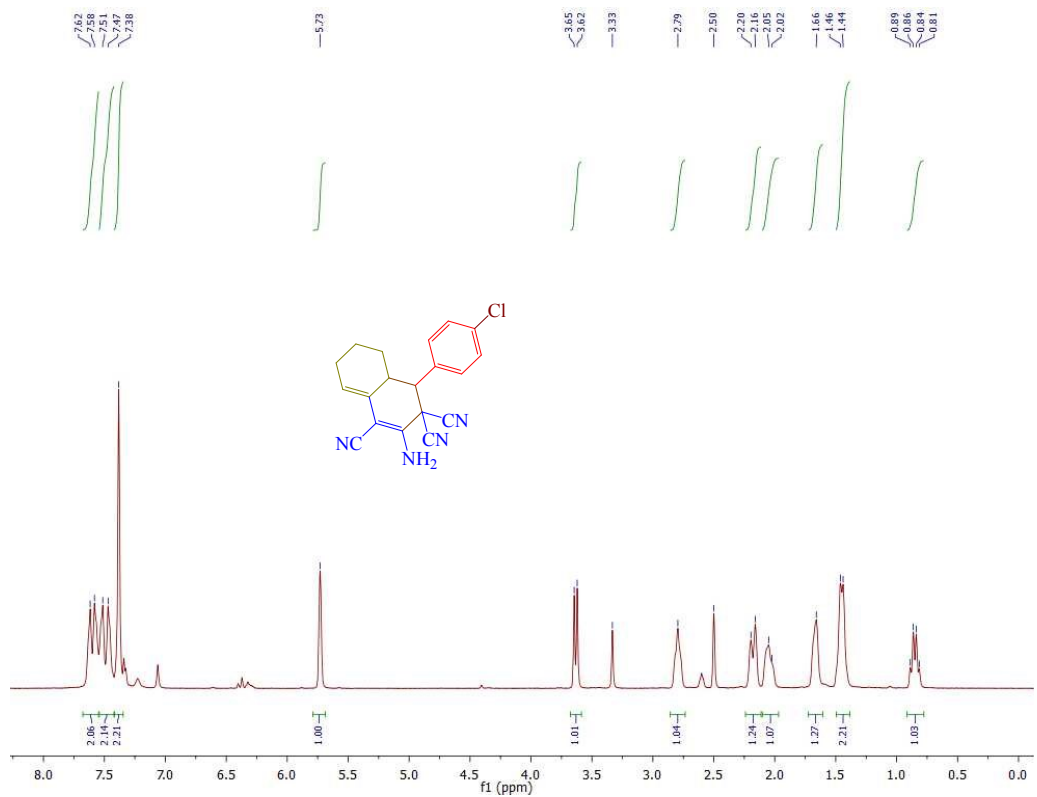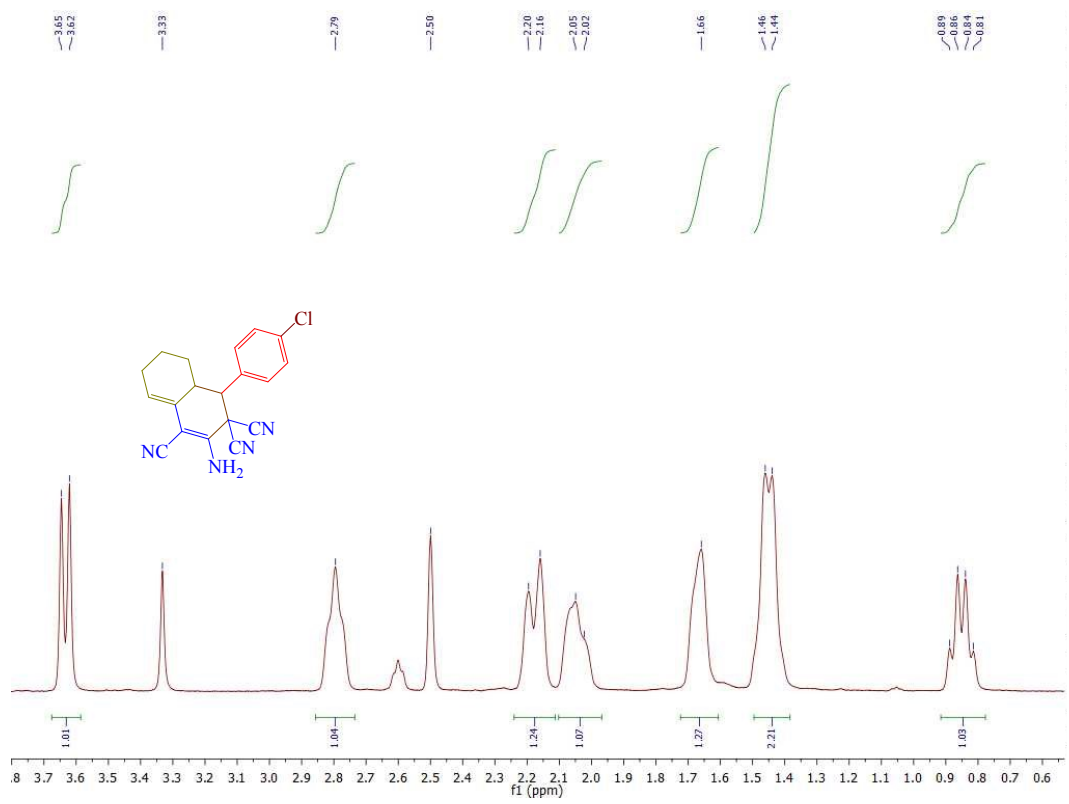

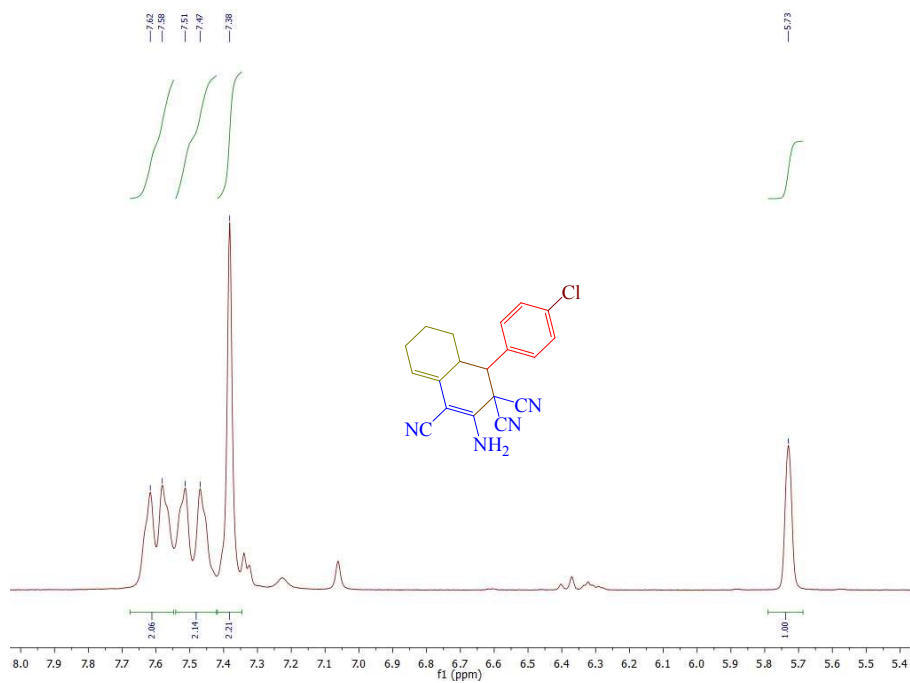

**Fig. S9.**  $^{13}\text{C}$  NMR spectrum of 2-amino-4-(4-chlorophenyl)-4a,5,6,7-tetrahydronaphthalene-1,3,3(*H*)-tricarbonitrile (6e)

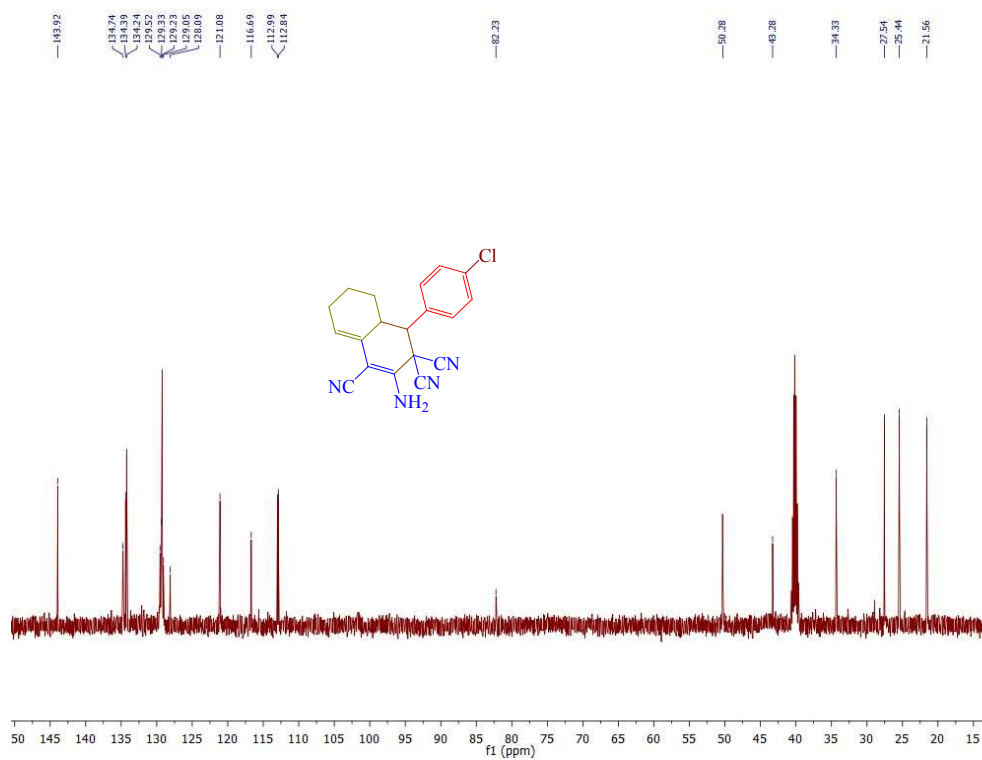

**Fig. S10.** FT-IR spectrum of 2-amino-4-(2-chlorophenyl)-4a,5,6,7-tetrahydronaphthalene-1,3,3(4*H*)-tricarbonitrile (6f)

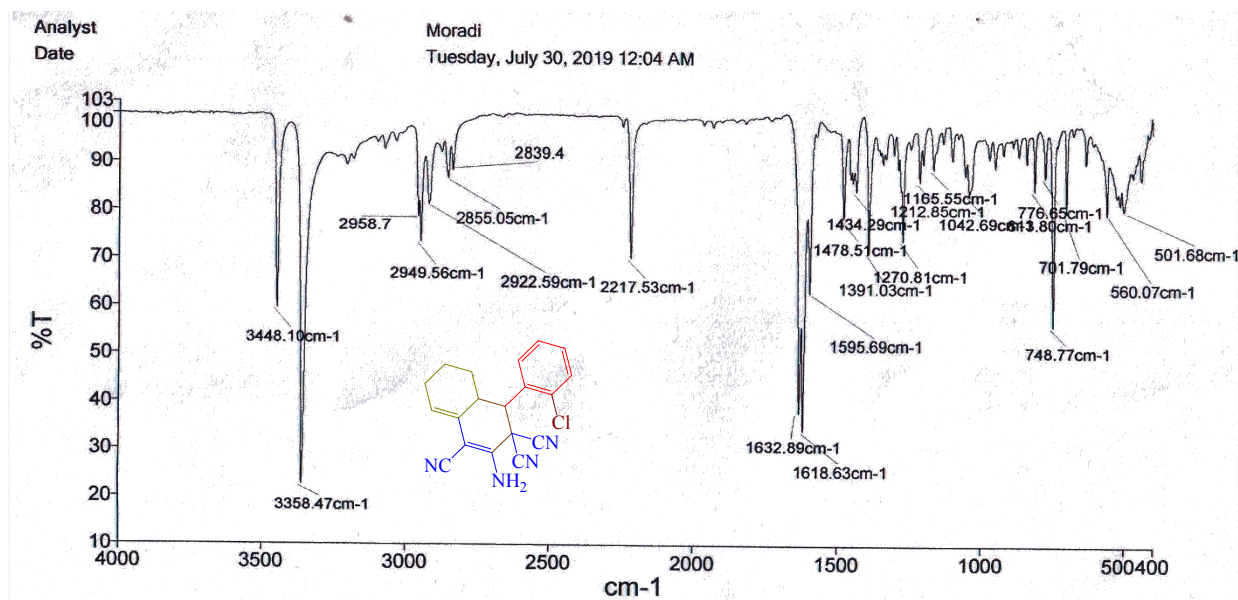

**Fig. S11.** <sup>1</sup>H NMR spectrum of 2-amino-4-(2-chlorophenyl)-4a,5,6,7-tetrahydronaphthalene-1,3,3(4*H*)-tricarbonitrile (6f)

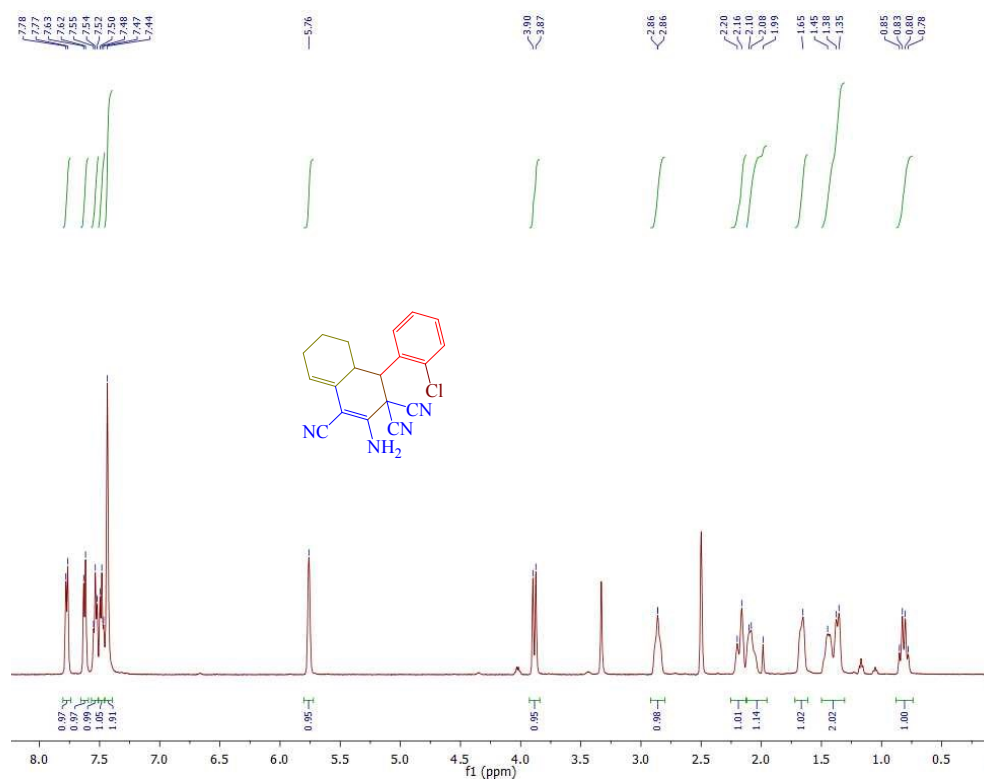

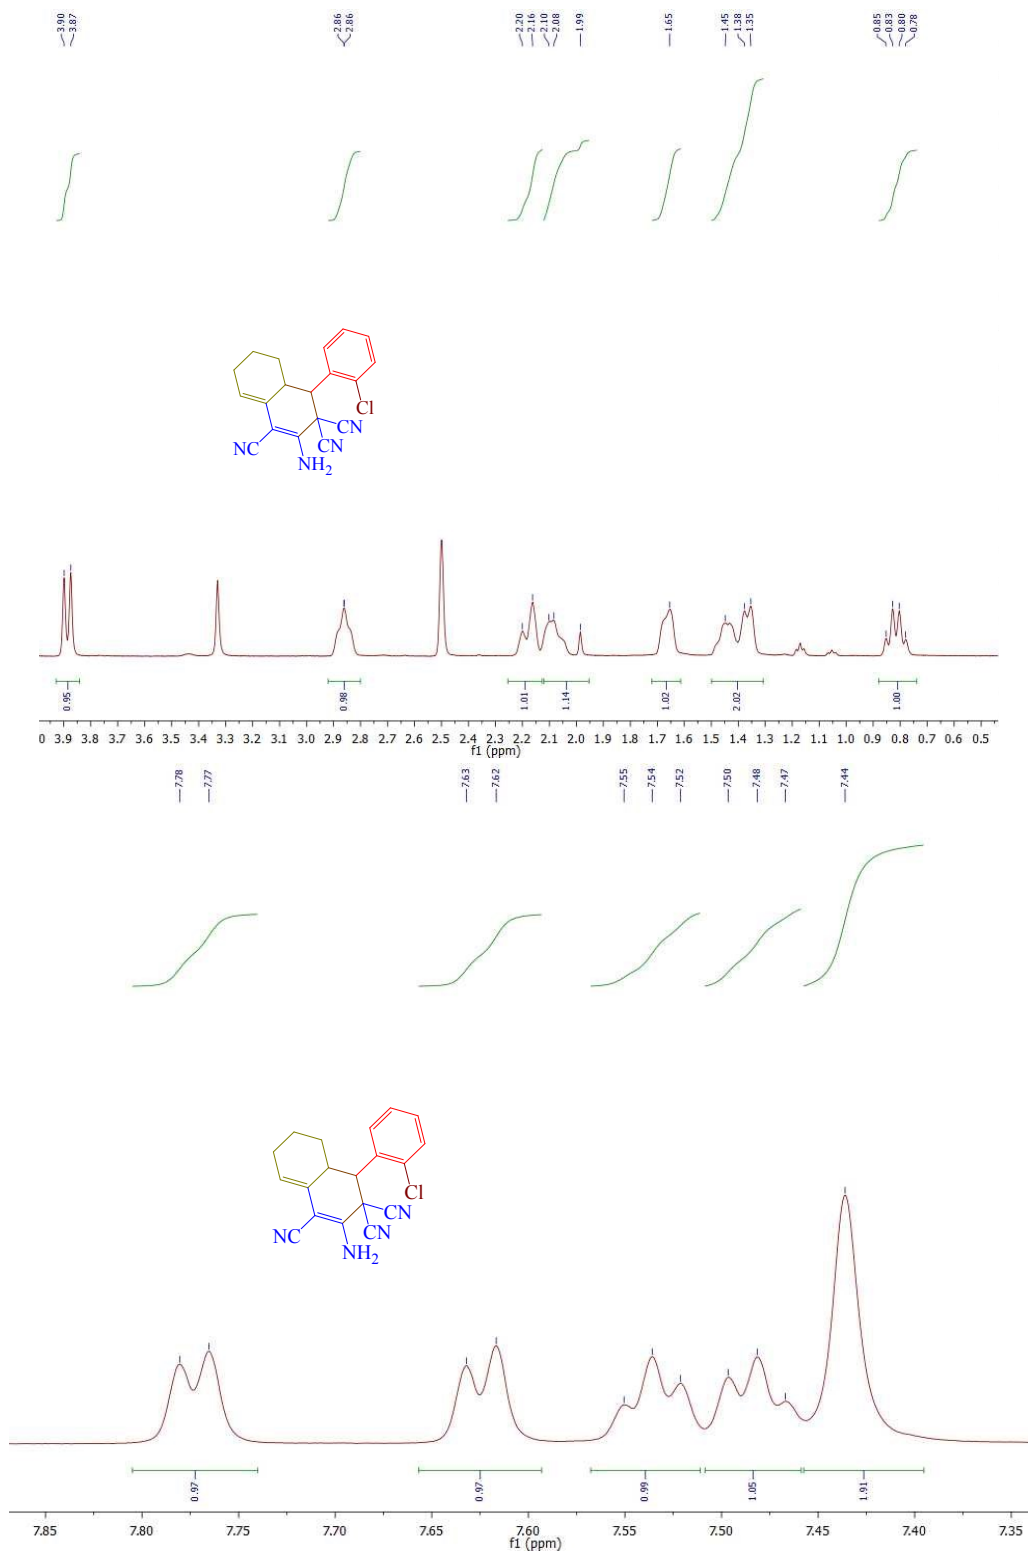



**Fig. S12.**  $^{13}\text{C}$  NMR spectrum of 2-amino-4-(2-chlorophenyl)-4a,5,6,7-tetrahydronaphthalene-1,3,3(4*H*)-tricarbonitrile (6f)

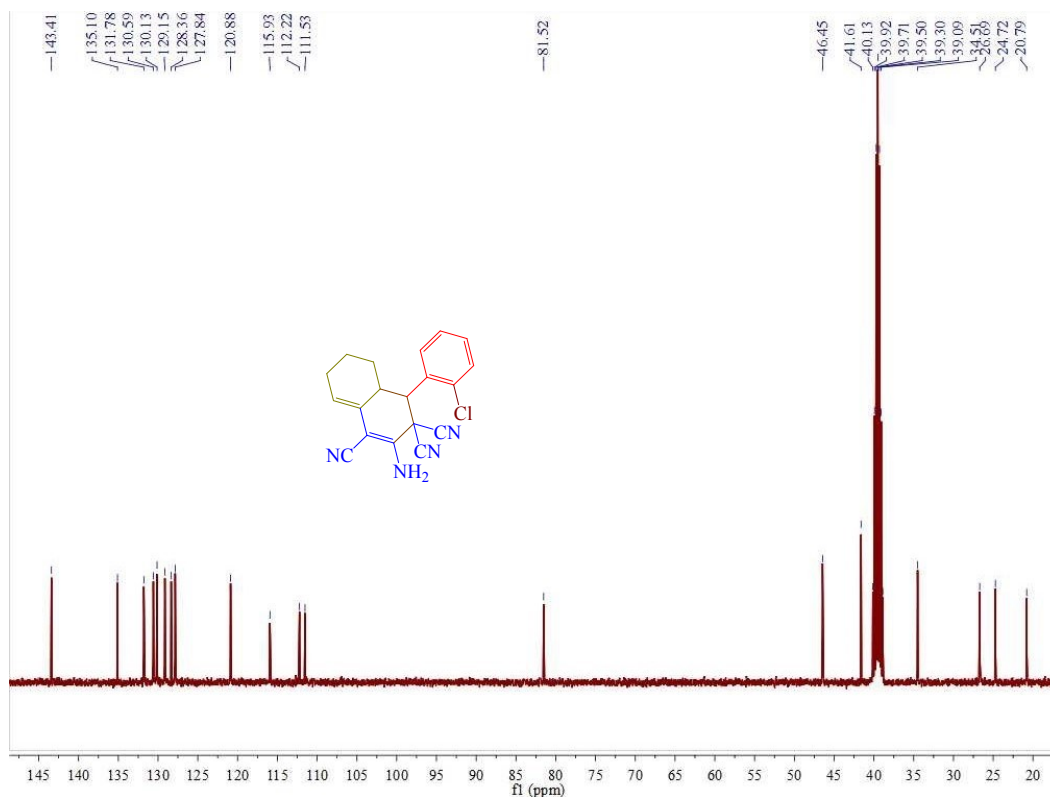

**Fig. S13.** FT-IR spectrum of 2-amino-4-(2,4-dichlorophenyl)-4a,5,6,7-tetrahydronaphthalene-1,3,3(4*H*)-tricarbonitrile (6g)

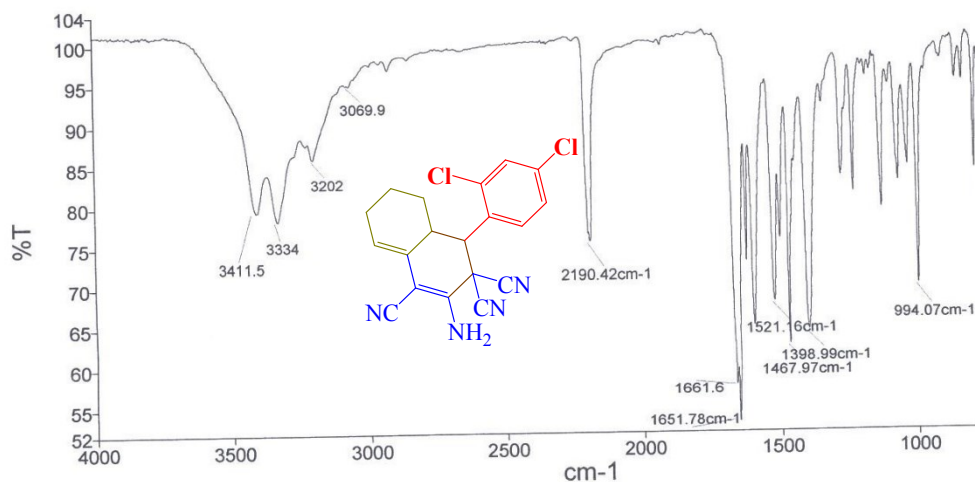

**Fig. S14.**  $^1\text{H}$  NMR spectrum of 2-amino-4-(2,4-dichlorophenyl)-4a,5,6,7-tetrahydronaphthalene-1,3,3(4*H*)-tricarbonitrile (6g)

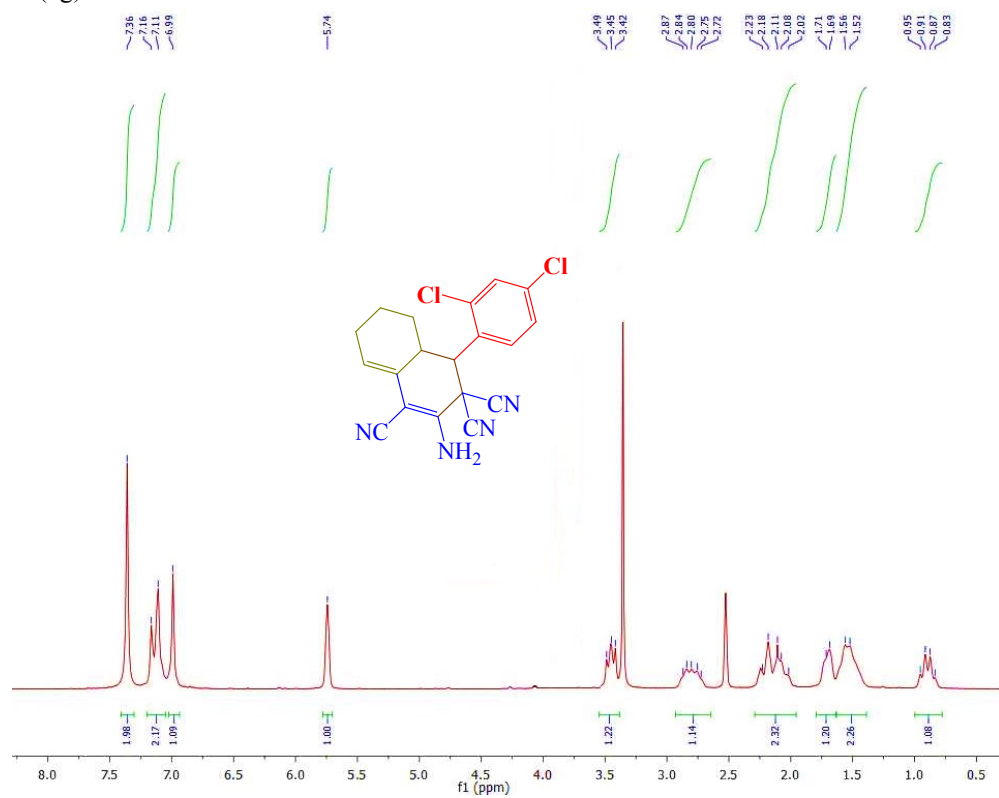

**Fig. S15.**  $^{13}\text{C}$  NMR spectrum of 2-amino-4-(2,4-dichlorophenyl)-4a,5,6,7-tetrahydronaphthalene-1,3,3(4*H*)-tricarbonitrile (6g)

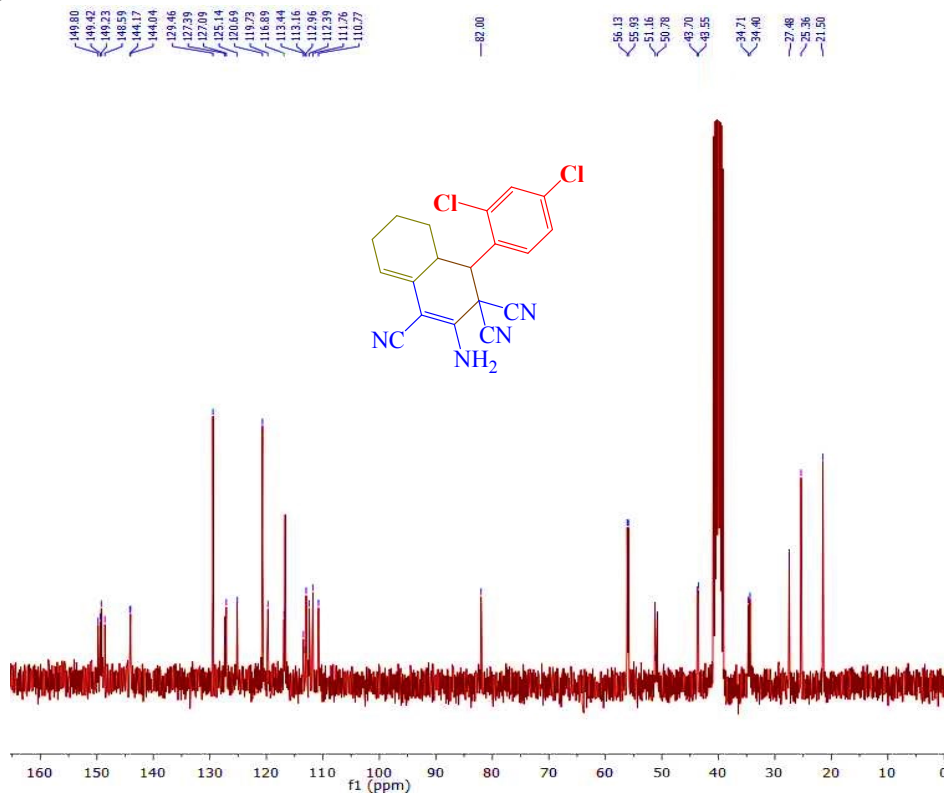

**Fig. S16.** FT-IR spectrum of 2-amino-4-(4-bromophenyl)-4a,5,6,7-tetrahydronaphthalene-1,3,3(4*H*)-tricarbonitrile (6j)

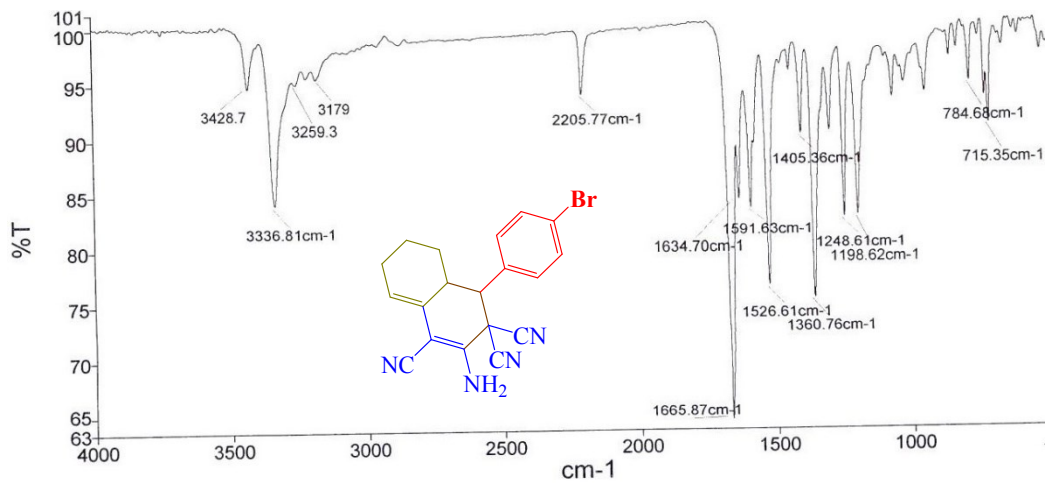

**Fig. S17.**  $^1\text{H}$  NMR spectrum of 2-amino-4-(4-bromophenyl)-4a,5,6,7-tetrahydronaphthalene-1,3,3(4*H*)-tricarbonitrile (6j)

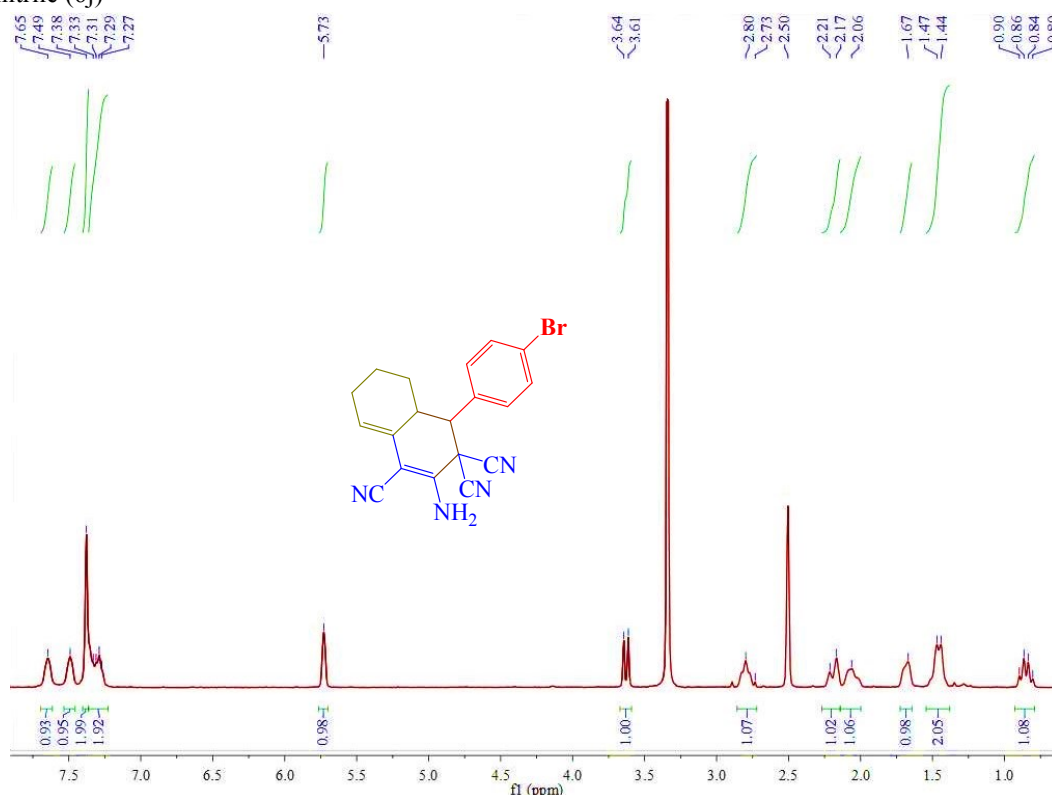

**Fig. S18.**  $^{13}\text{C}$  NMR spectrum of 2-amino-4-(4-bromophenyl)-4a,5,6,7-tetrahydronaphthalene-1,3,3(4*H*)-tricarbonitrile (6j)

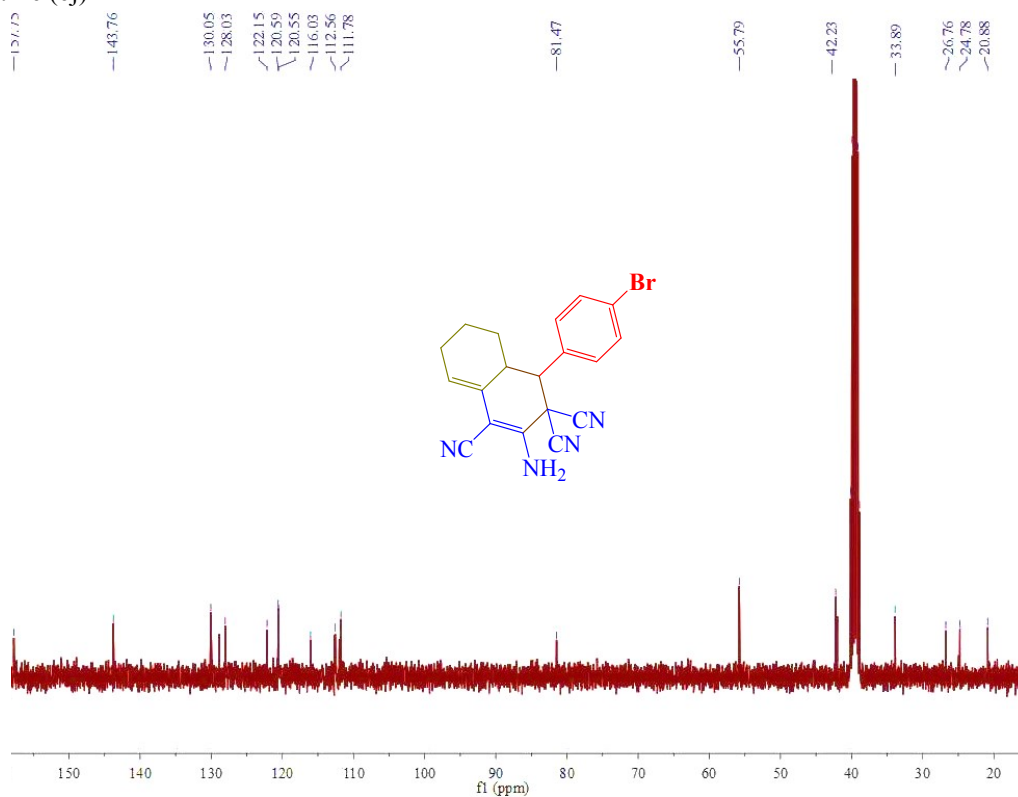

**Fig. S19.** FT-IR spectrum of 2-amino-4-(2-bromophenyl)-4a,5,6,7-tetrahydronaphthalene-1,3,3(4*H*)-tricarbonitrile (6l)

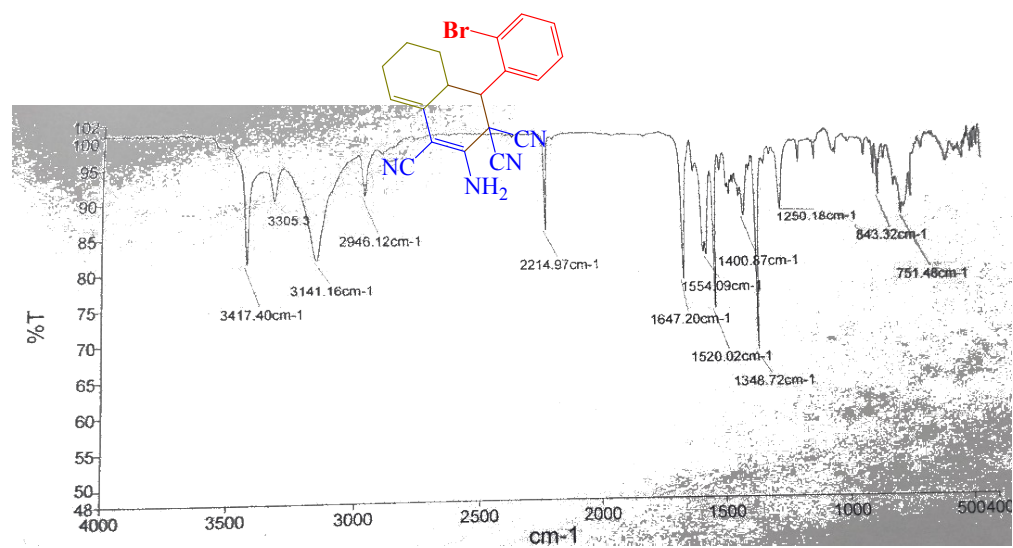

**Fig. S20.** <sup>1</sup>H NMR spectrum of 2-amino-4-(2-bromophenyl)-4a,5,6,7-tetrahydronaphthalene-1,3,3(4*H*)-tricarbonitrile (6l)

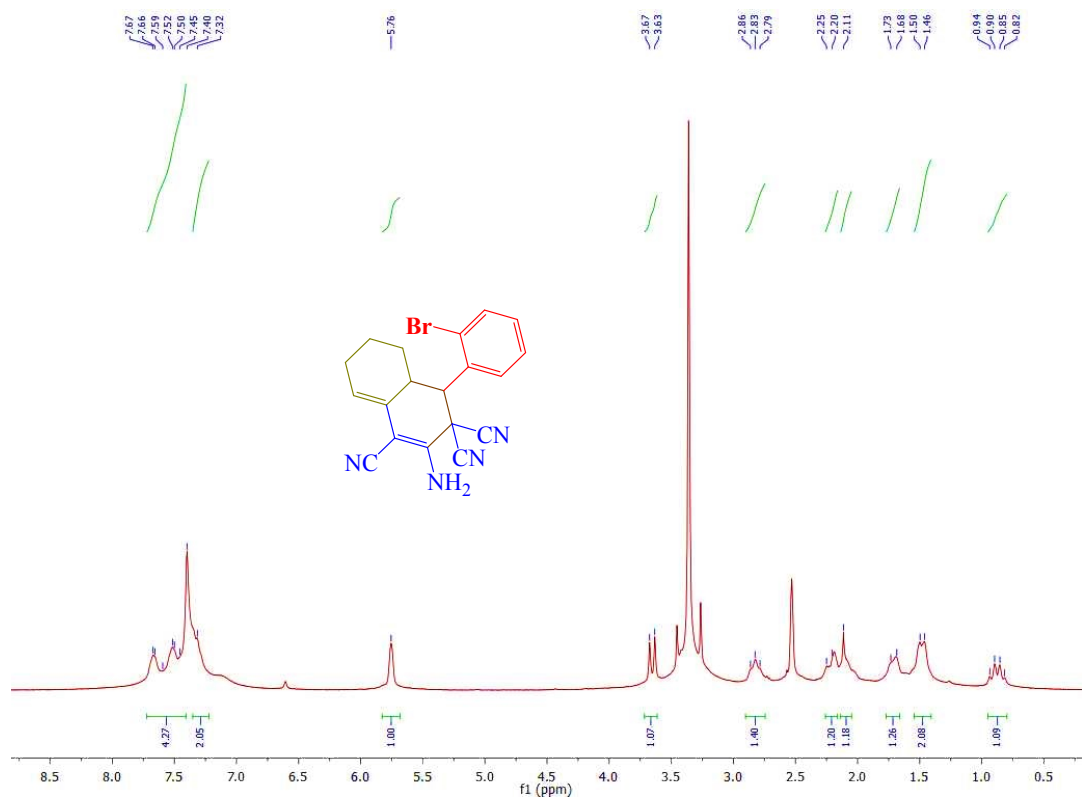

**Fig. S21.**  $^{13}\text{C}$  NMR spectrum of 2-amino-4-(2-bromophenyl)-4a,5,6,7-tetrahydronaphthalene-1,3,3(4H)-tricarbonitrile (6l)

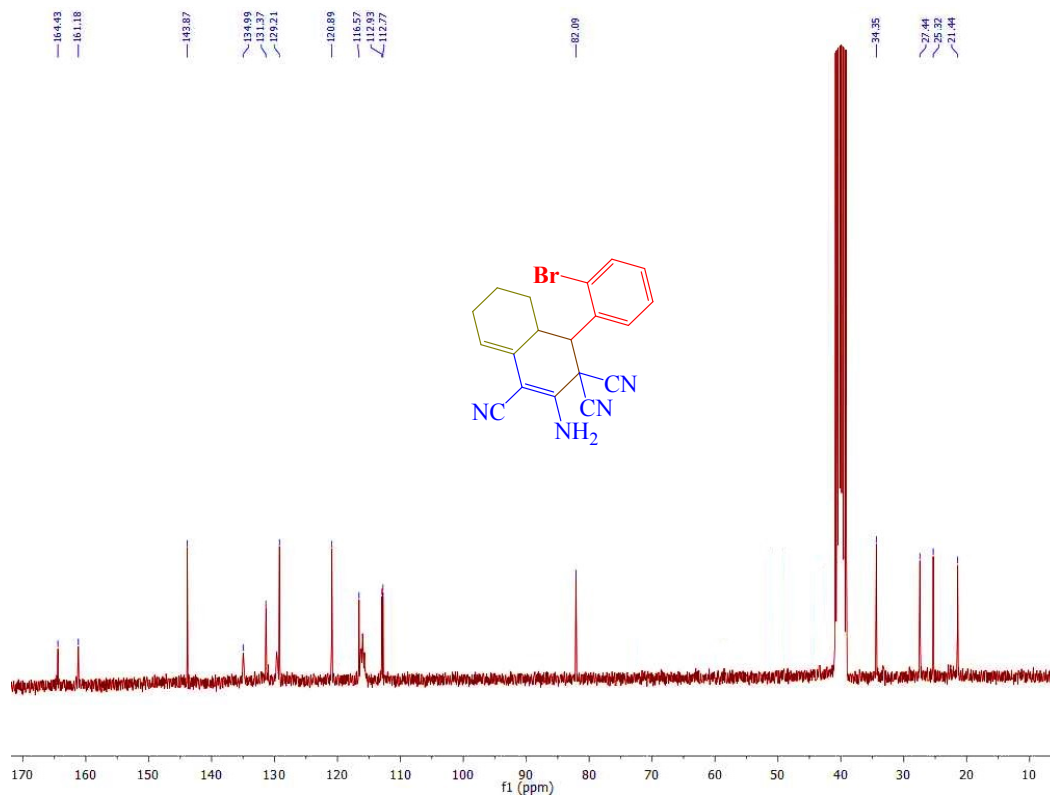

Fig. S22. FT-IR spectrum of 2-amino-4a,5,6,7-tetrahydro-4-p-tolynaphthalene-1,3,3(4H)-tricarbonitrile (6m)

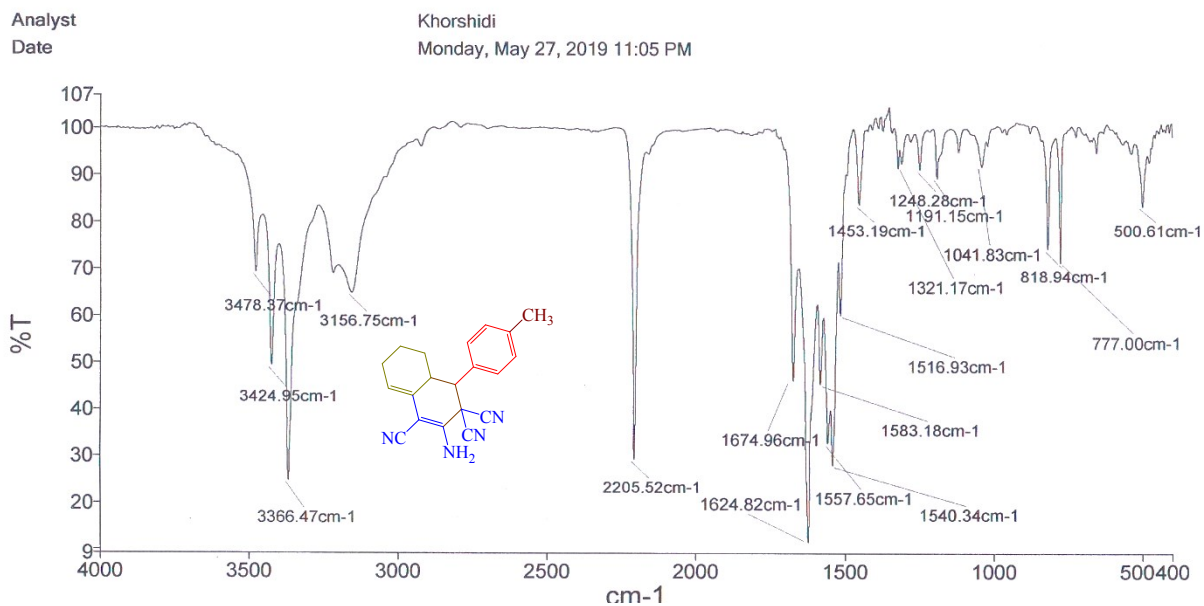

Fig. S23. <sup>1</sup>H NMR spectrum of 2-amino-4a,5,6,7-tetrahydro-4-p-tolynaphthalene-1,3,3(4H)-tricarbonitrile (6m)

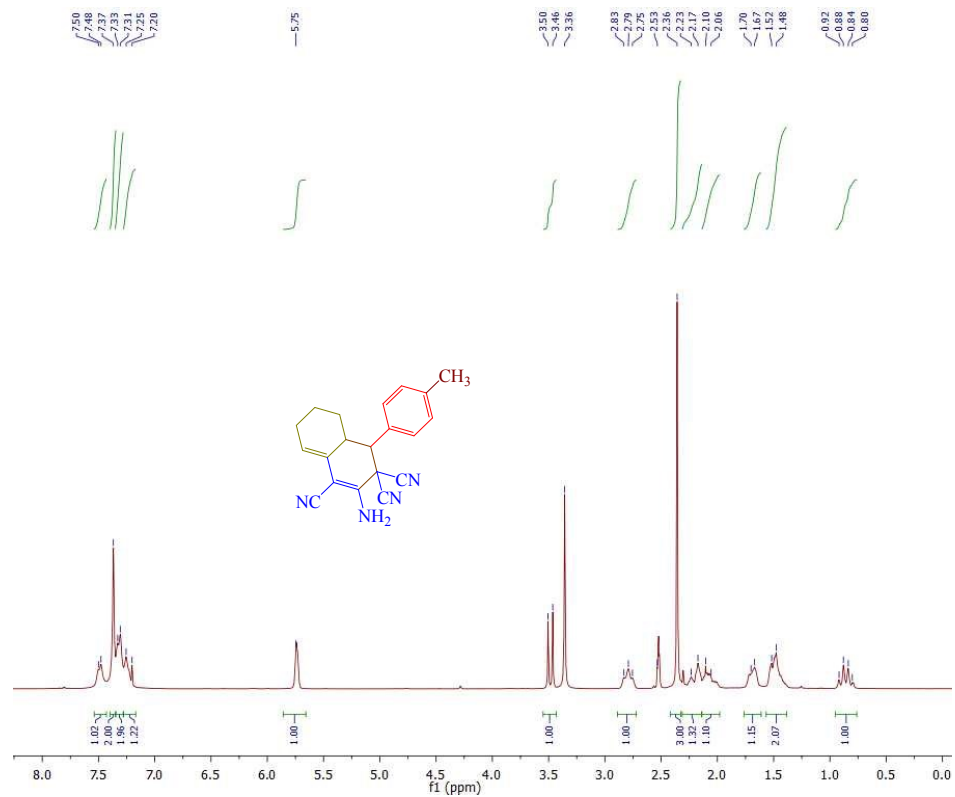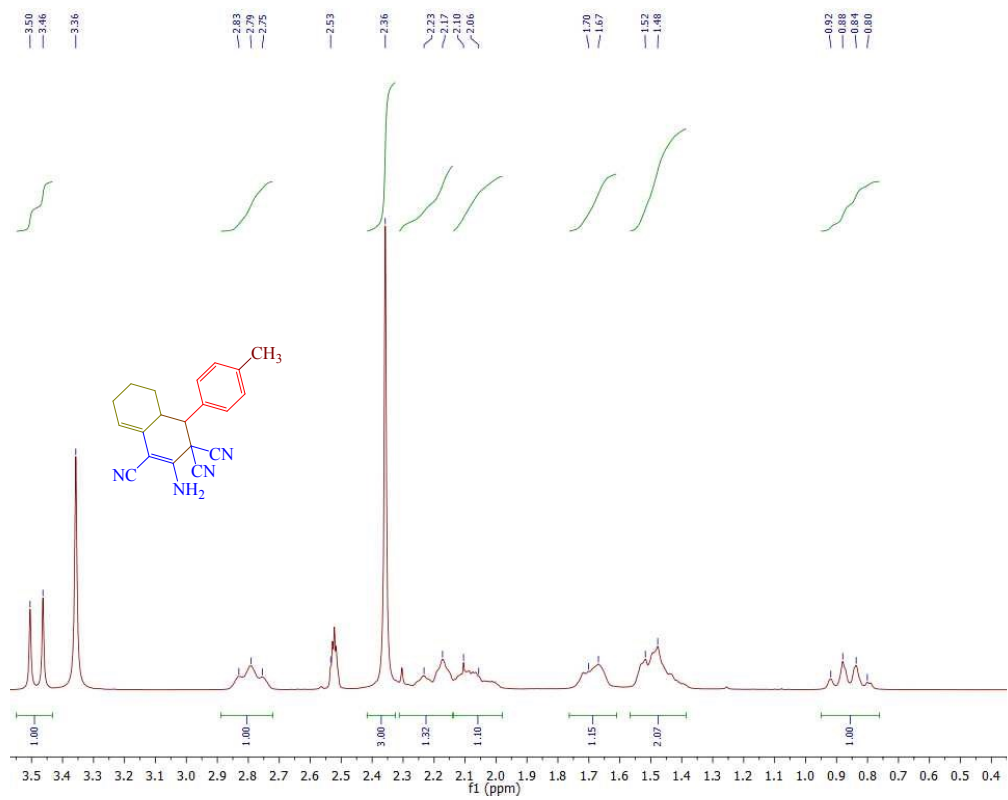



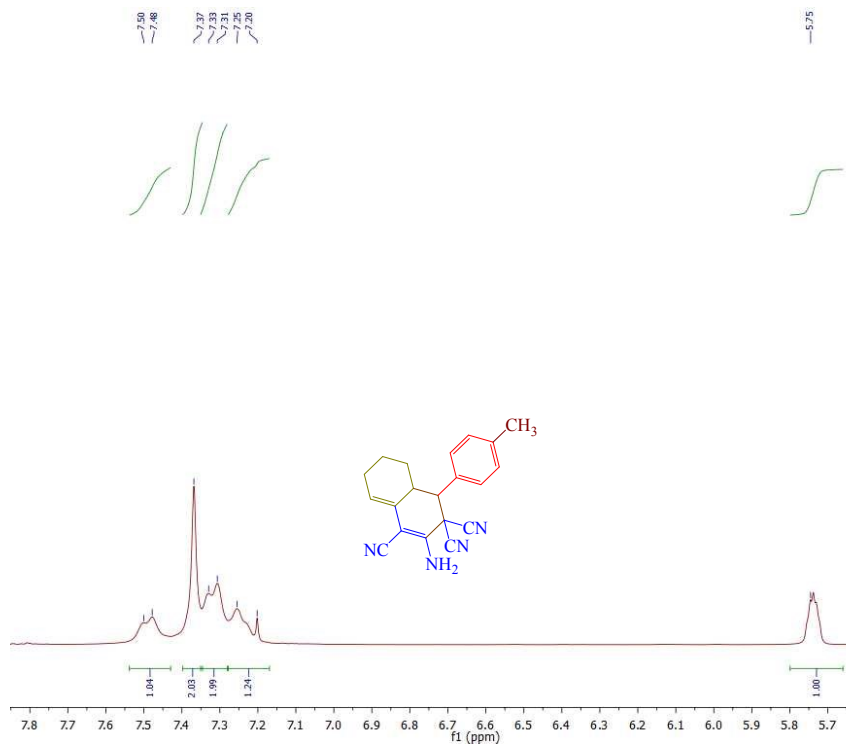

**Fig. S24.**  $^{13}\text{C}$  NMR spectrum of 2-amino-4-(4-methylphenyl)-4a,5,6,7-tetrahydro-4-p-tolynaphthalene-1,3,3(4*H*)-tricarbonitrile (6m)

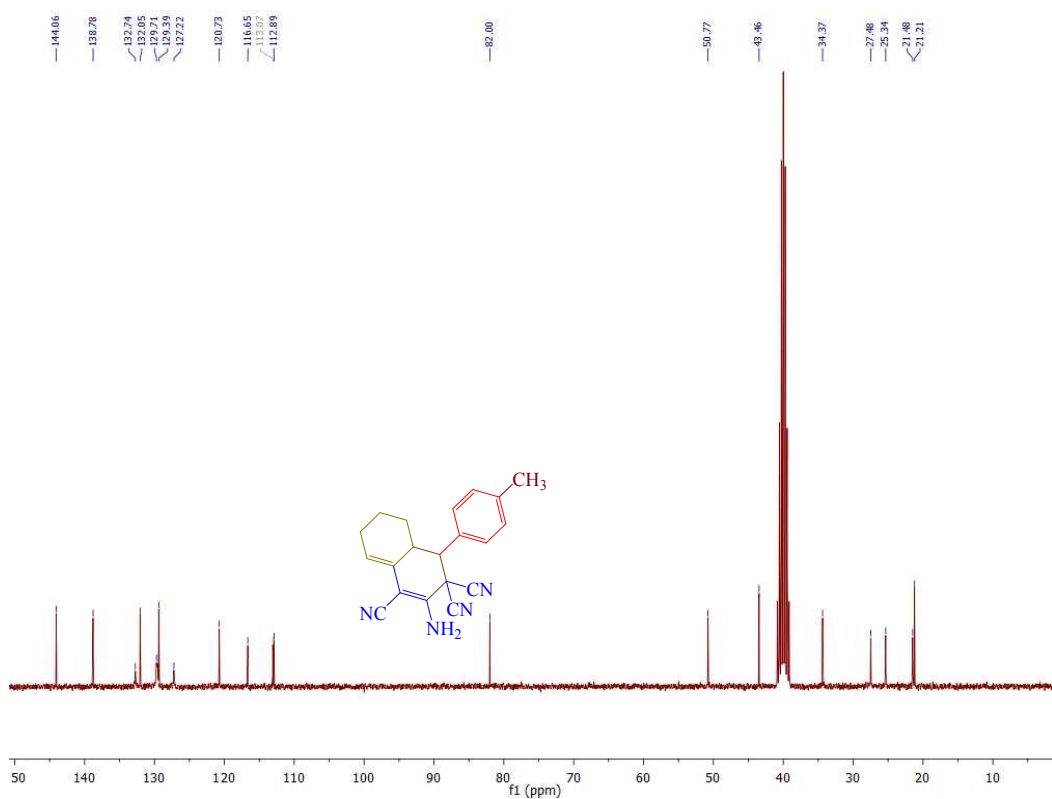

**Fig. S25.** FT-IR spectrum of 2-amino-4-(4-methoxyphenyl)-4a,5,6,7-tetrahydronaphthalene-1,3,3(4*H*)-tricarbonitrile (6n)

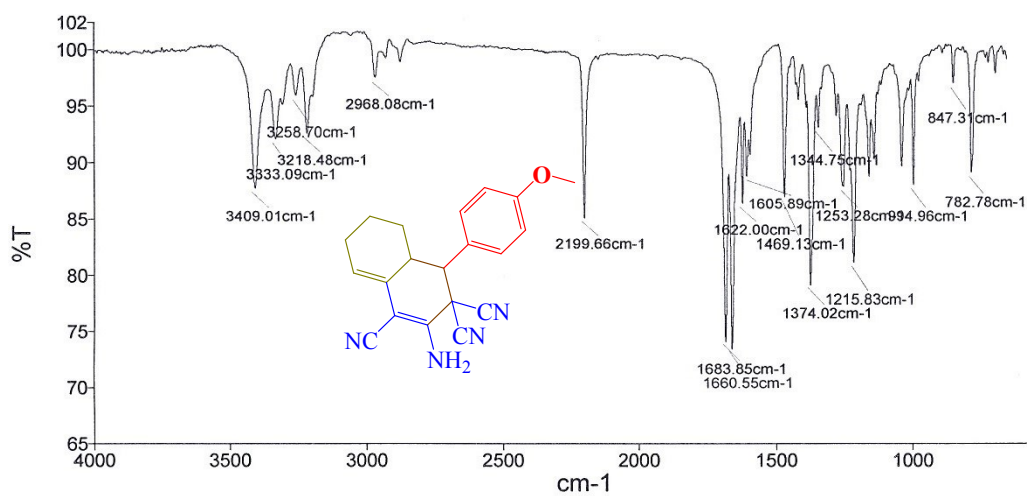

**Fig. S26.**  $^1\text{H}$  NMR spectrum of 2-amino-4-(4-methoxyphenyl)-4a,5,6,7-tetrahydronaphthalene-1,3,3(4*H*)-tricarbonitrile (6n)

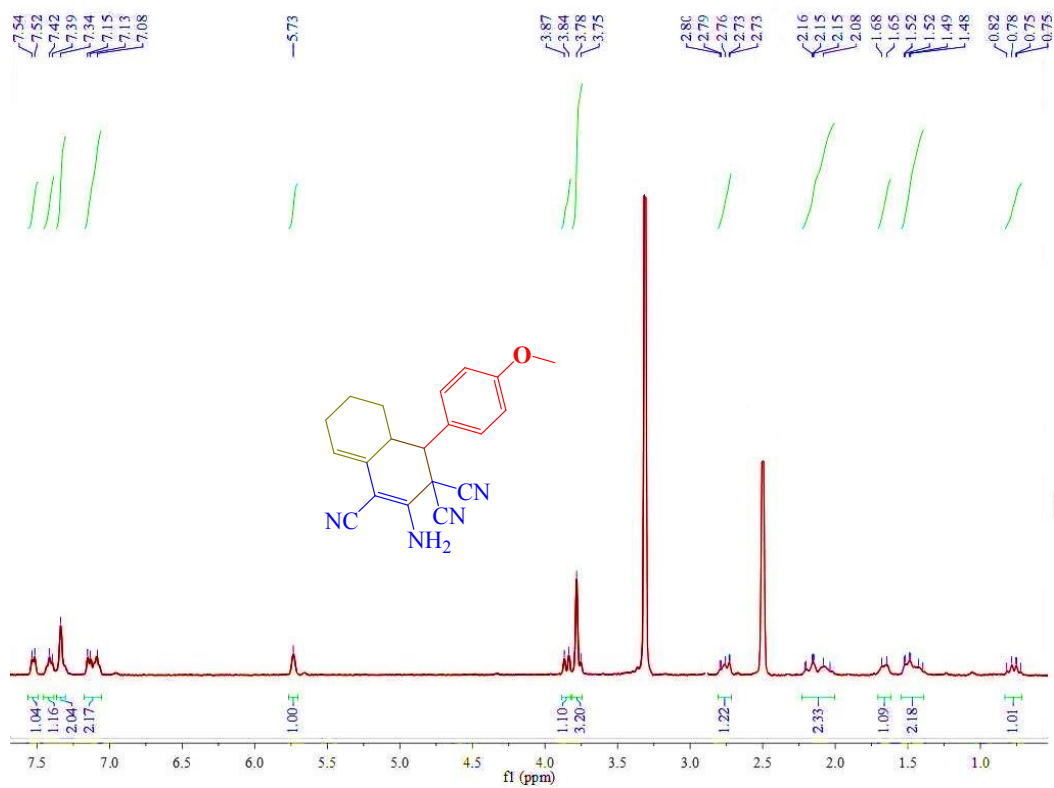

**Fig. S27.**  $^{13}\text{C}$  NMR spectrum of 2-amino-4-(4-methoxyphenyl)-4a,5,6,7-tetrahydronaphthalene-1,3,3(4H)-tricarbonitrile (6n)

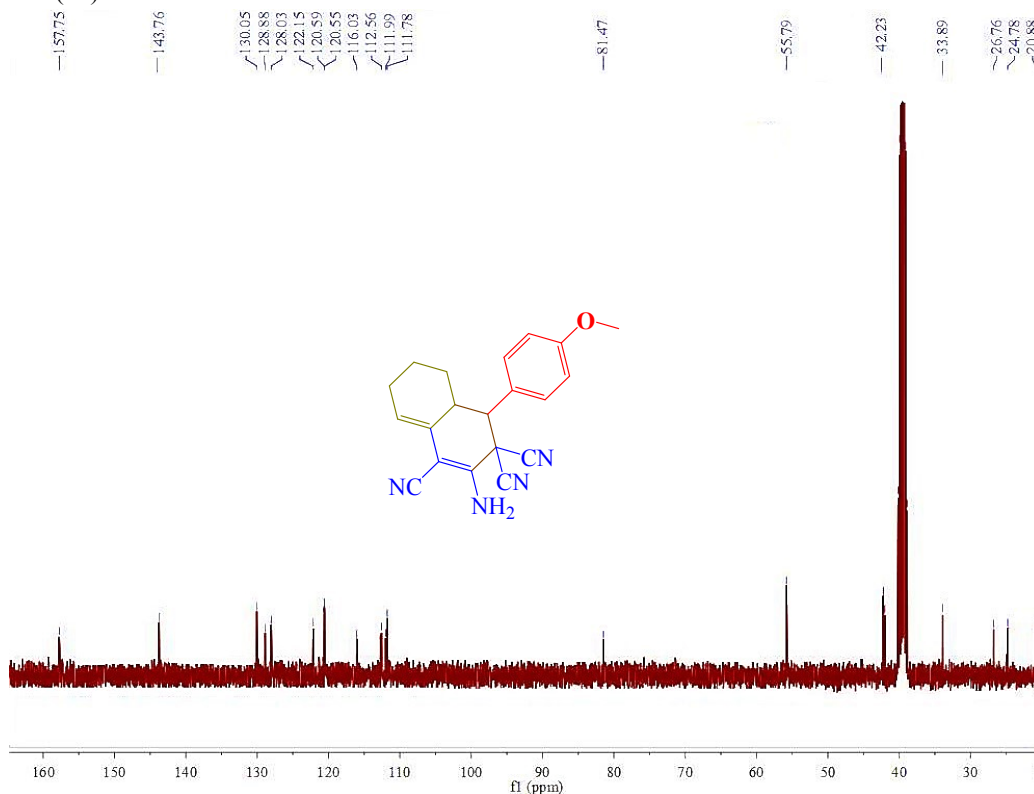

**Fig. S28.** FT-IR spectrum of 2-amino-4-(3,4-Dimethoxyphenyl)-4a,5,6,7-tetrahydronaphthalene-1,3,3(4H)-tricarbonitrile (6p)

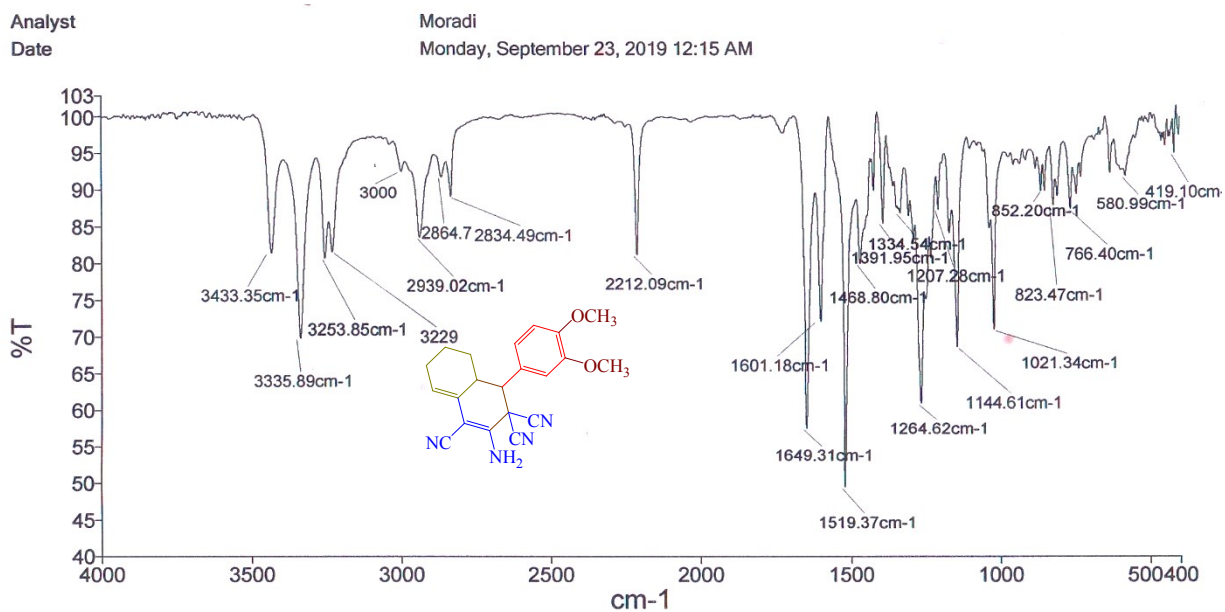

**Fig. S29.**  $^1\text{H}$  NMR spectrum of 2-amino-4-(3,4-Dimethoxyphenyl)-4a,5,6,7-tetrahydronaphthalene-1,3,3(4*H*)-tricarbonitrile (6p)

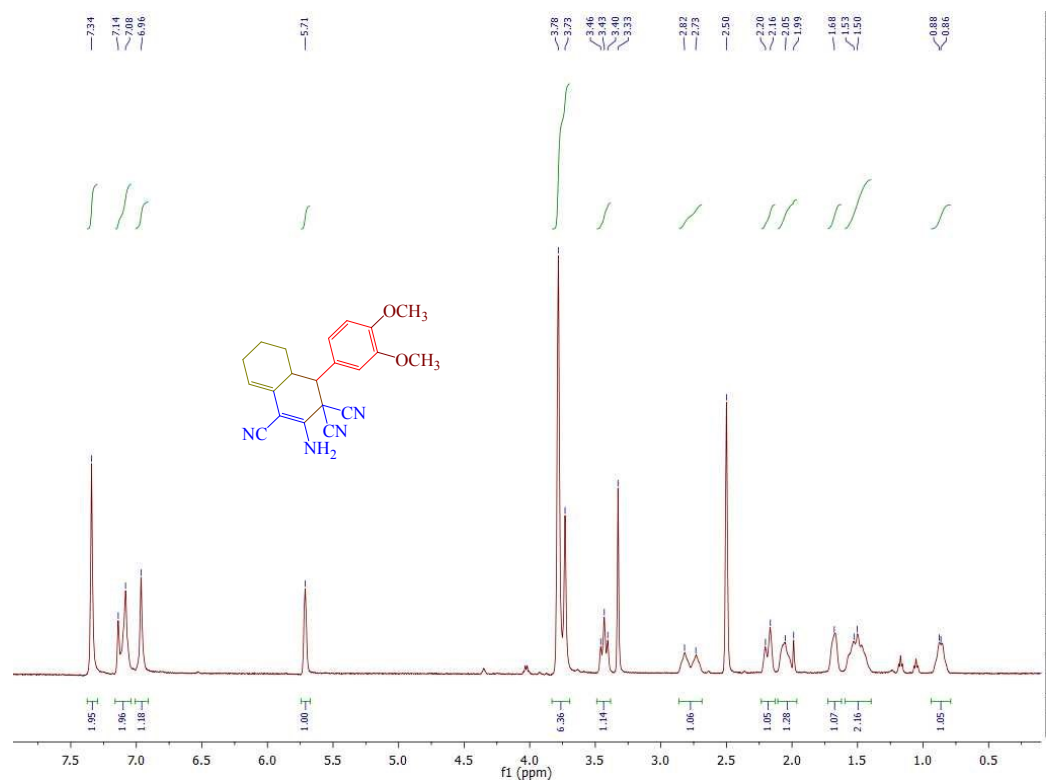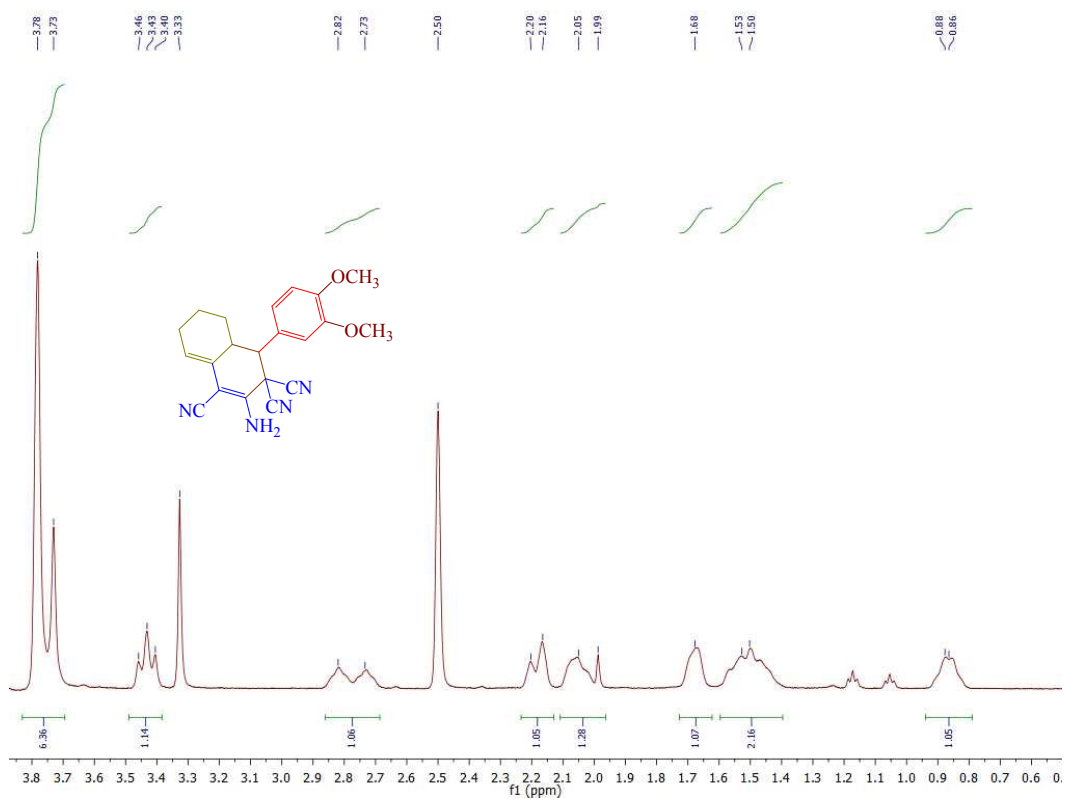

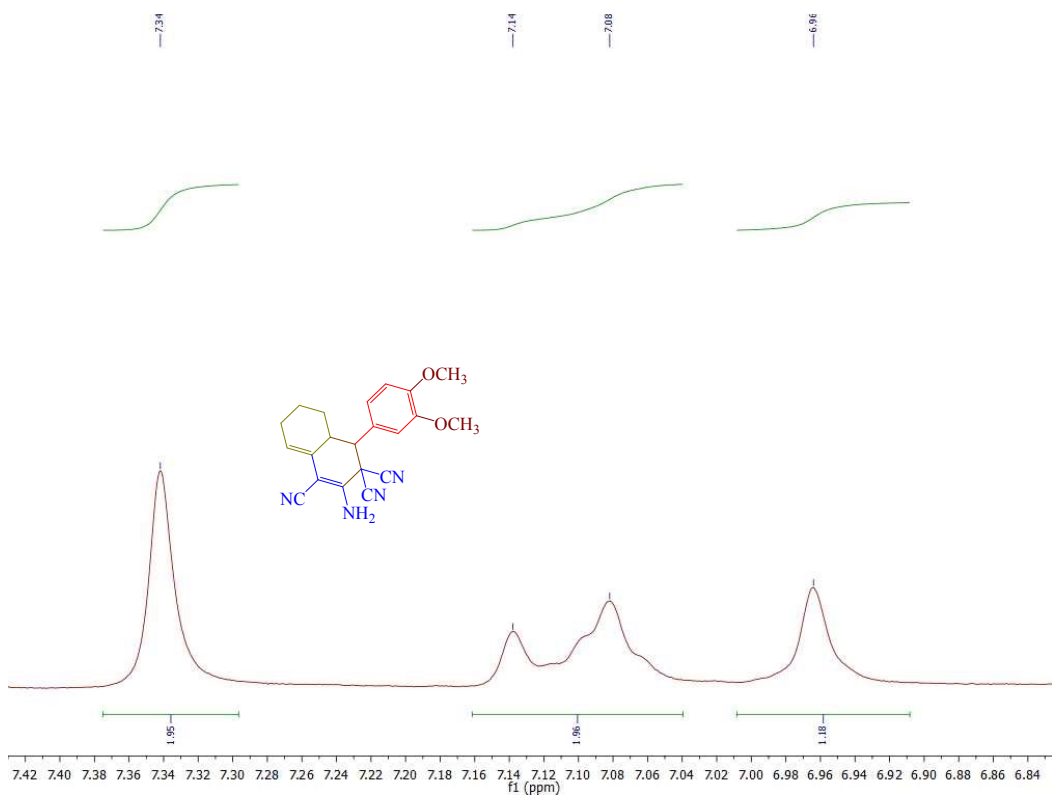

**Fig. S30.**  $^{13}\text{C}$  NMR spectrum of 2-amino-4-(3,4-Dimethoxyphenyl)-4a,5,6,7-tetrahydronaphthalene-1,3,3(4*H*)-tricarbonitrile (6p)

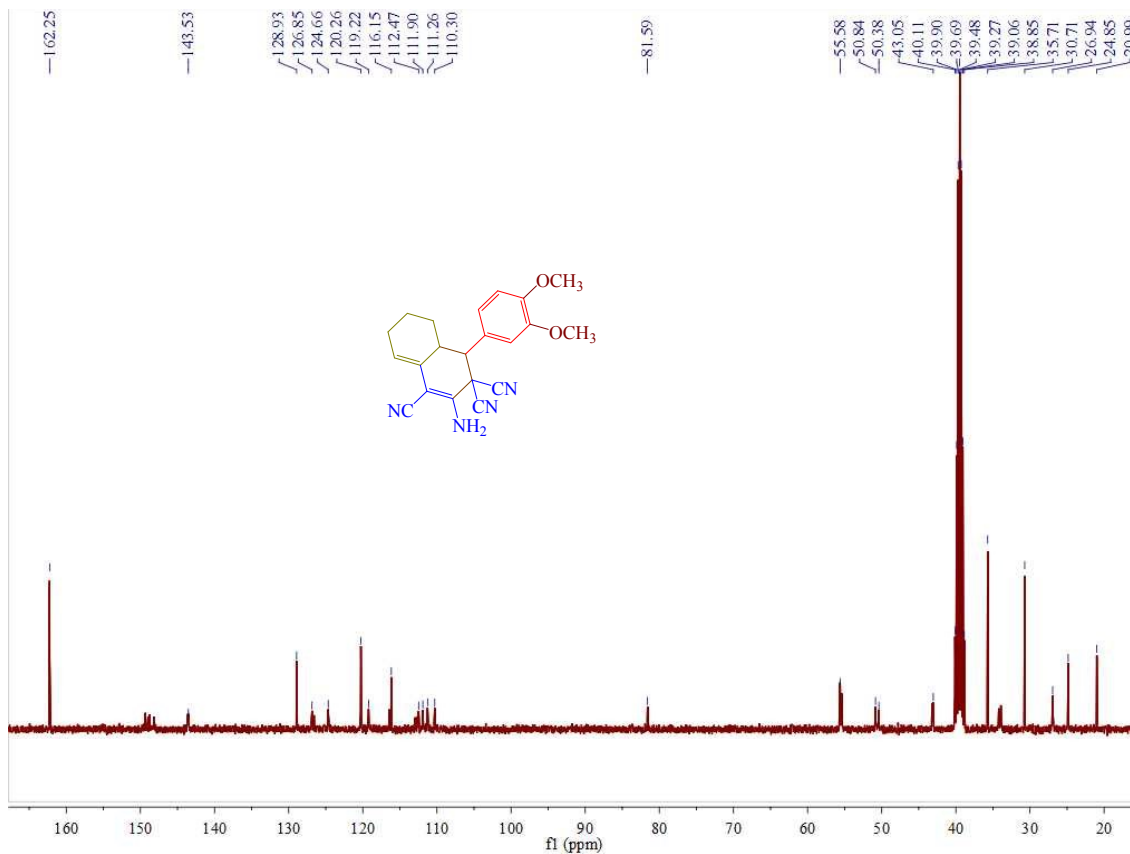

**Fig. S31.** FT-IR spectrum of 2-amino-4-(4-methoxyphenyl)-5,6,7,8-tetrahydroquinoline-3-carbonitrile (8b)

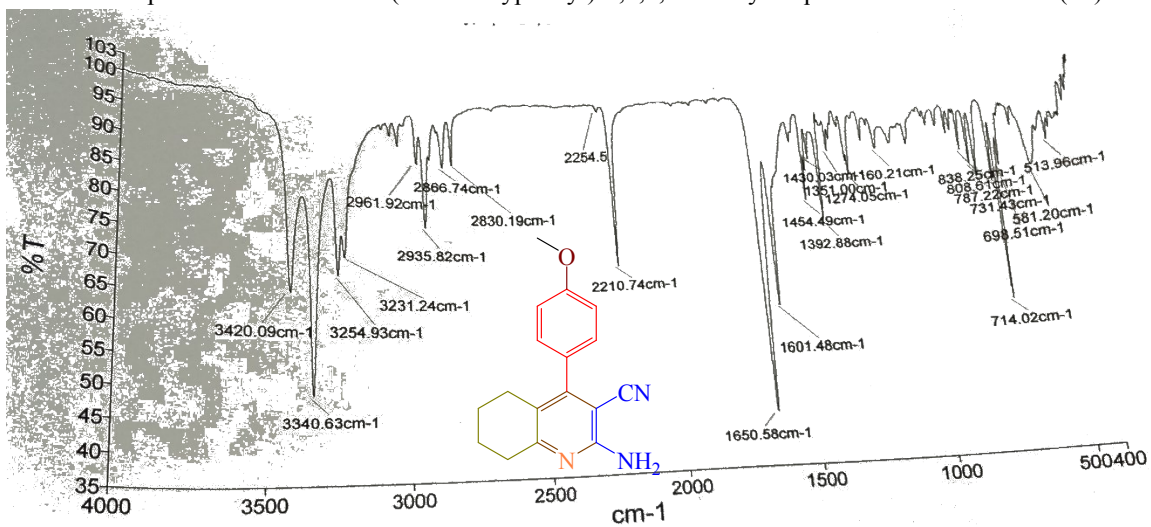

Fig. S32. <sup>1</sup>H NMR spectrum of 2-amino-4-(4-methoxyphenyl)-5,6,7,8-tetrahydroquinoline-3-carbonitrile (8b)

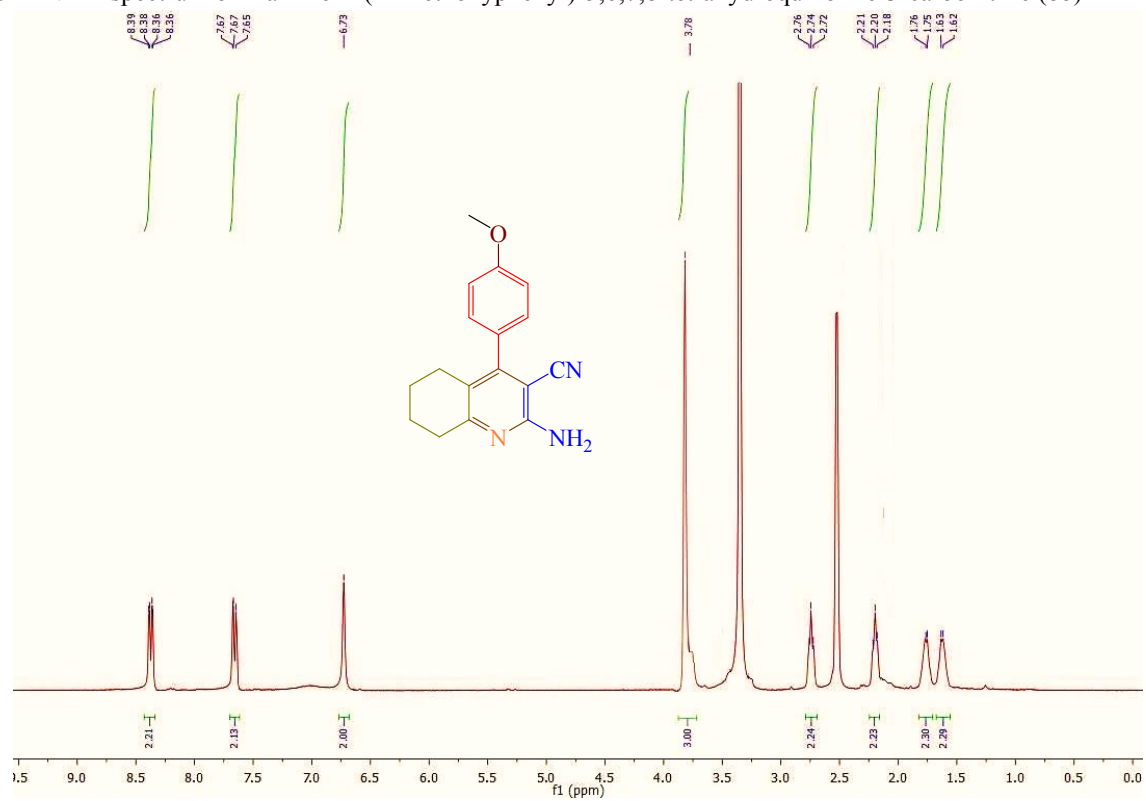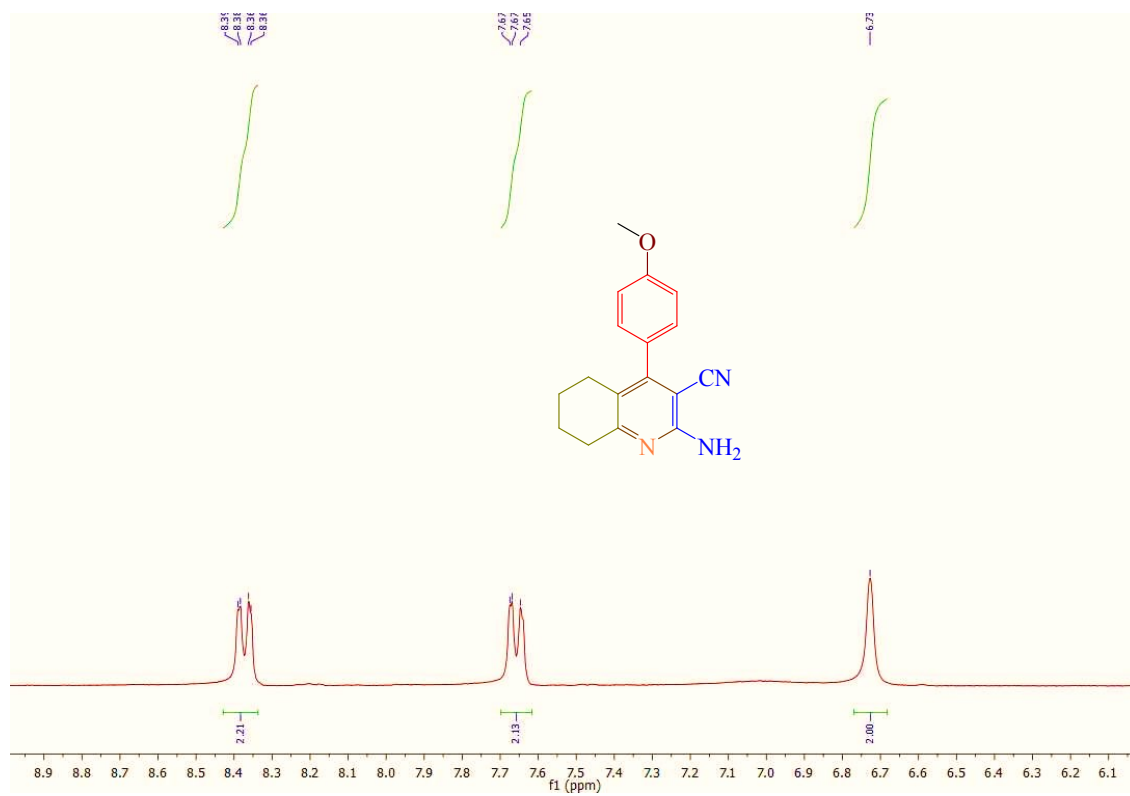



Fig. S33. <sup>13</sup>C NMR spectrum of 2-amino-4-(4-methoxyphenyl)-5,6,7,8-tetrahydroquinoline-3-carbonitrile (8b)

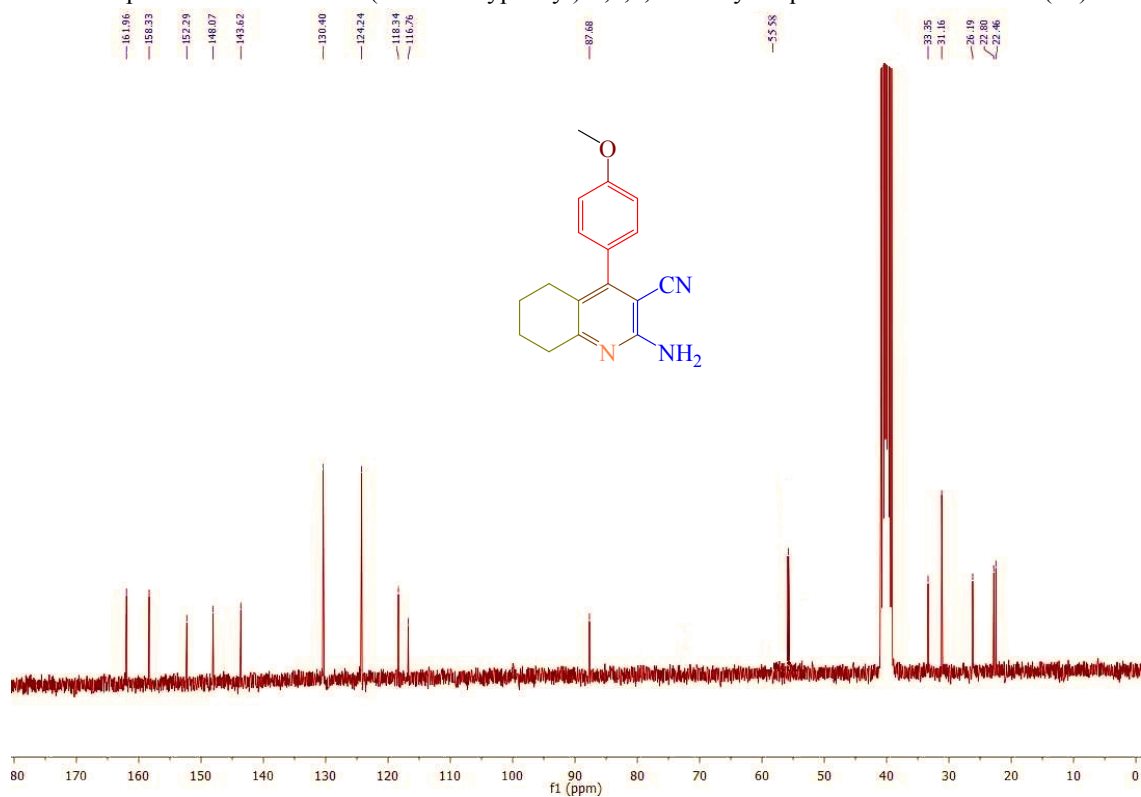

Fig. S34. FT-IR spectrum of 2-amino-4-(4-chlorophenyl)-5,6,7,8-tetrahydroquinoline-3-carbonitrile (8d)

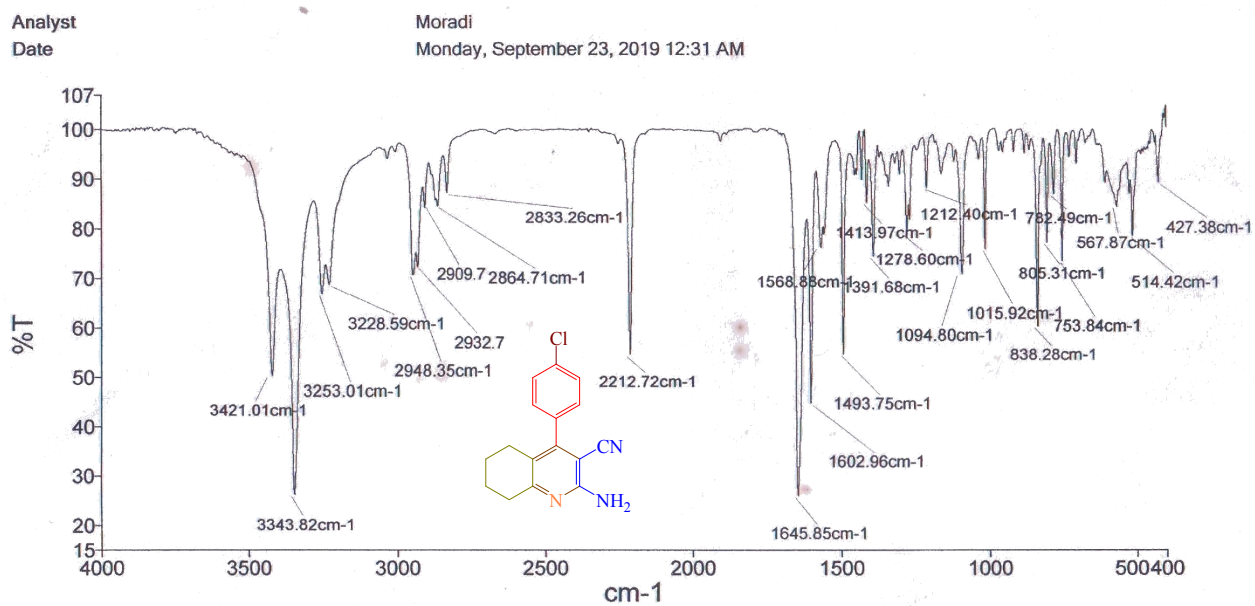

**Fig. S35.**  $^1\text{H}$  NMR spectrum of 2-amino-4-(4-chlorophenyl)-5,6,7,8-tetrahydroquinoline-3-carbonitrile (**8d**)

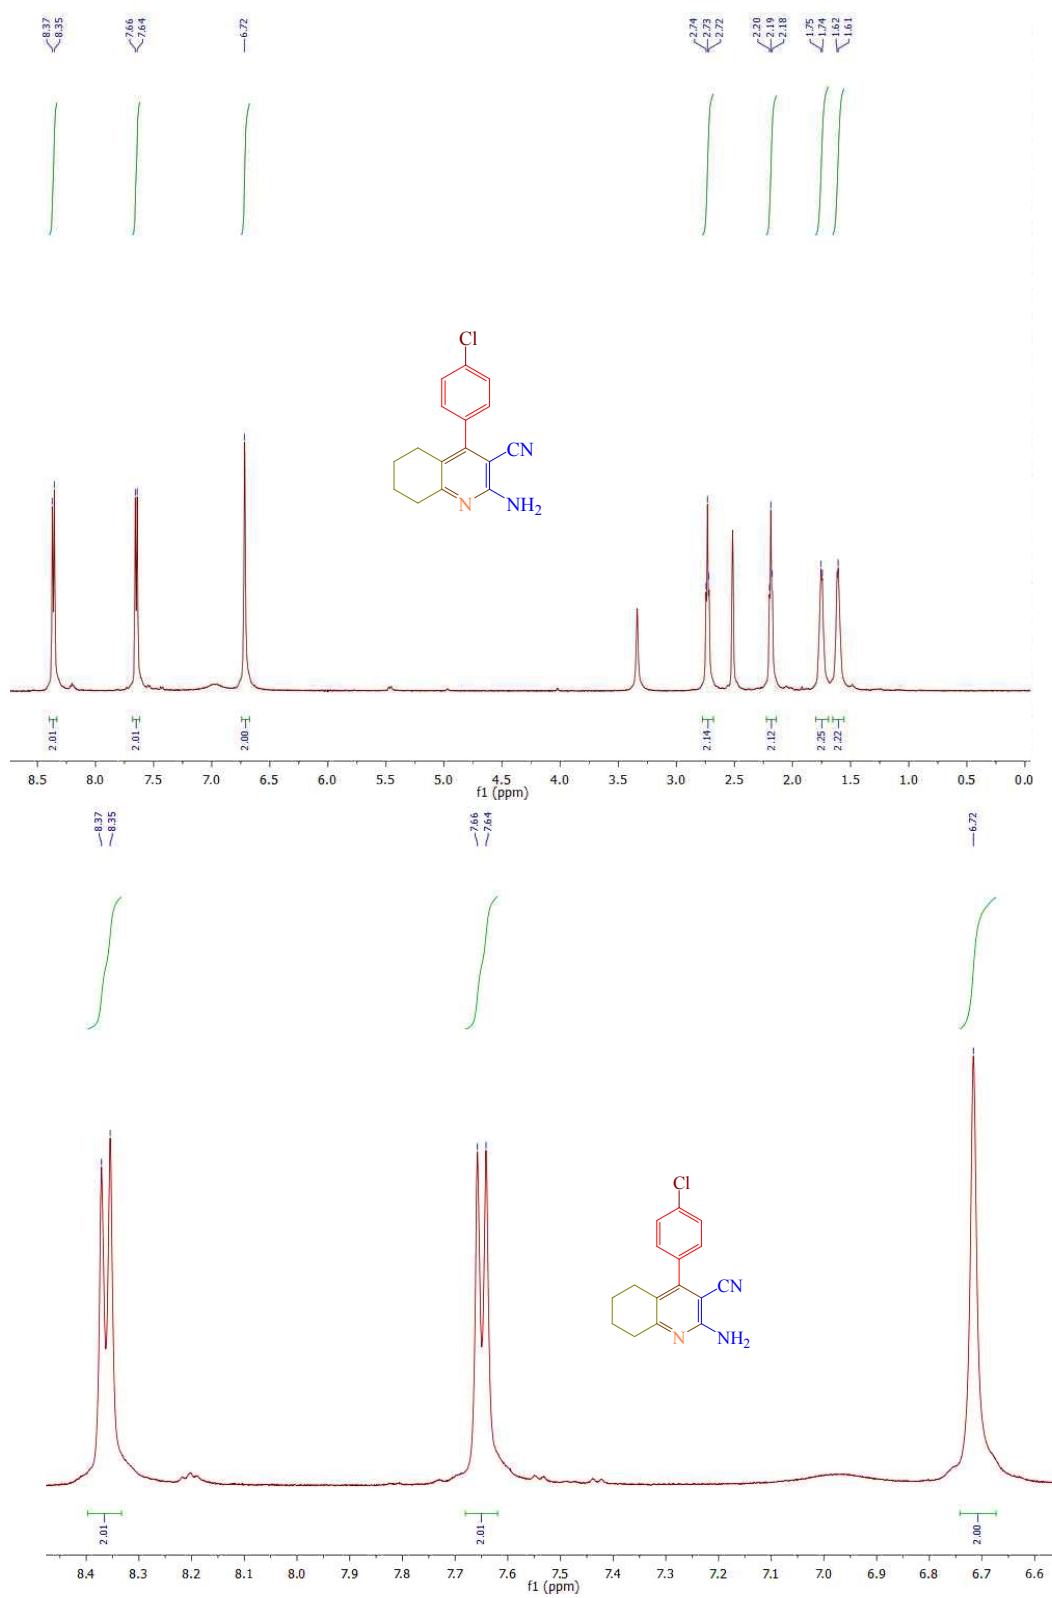

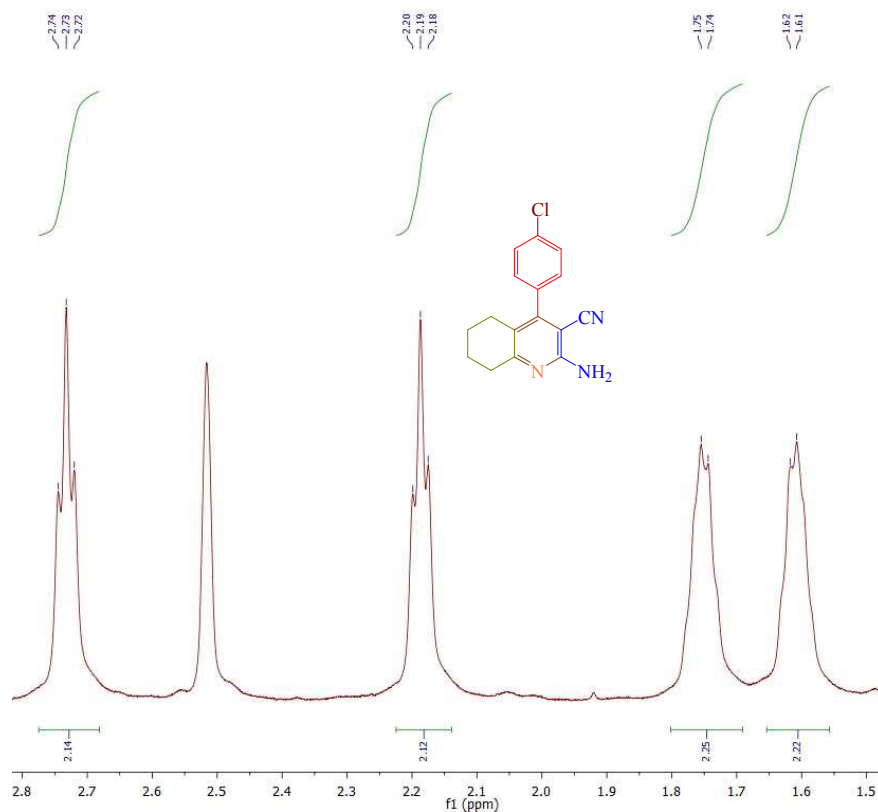

Fig. S36. <sup>13</sup>C NMR spectrum of 2-amino-4-(4-chlorophenyl)-5,6,7,8-tetrahydroquinoline-3-carbonitrile (8d)

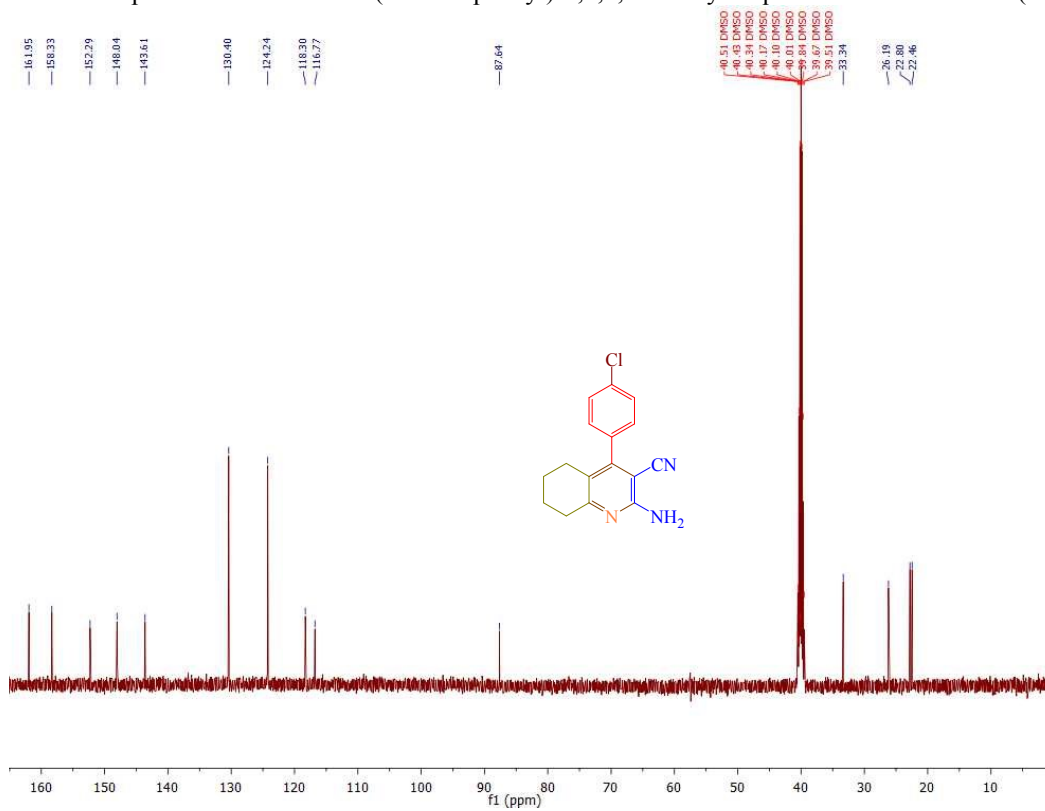

**Fig. S37.** FT-IR spectrum of 2-amino-4-(4-bromophenyl)-5,6,7,8-tetrahydroquinoline-3-carbonitrile (**8e**)

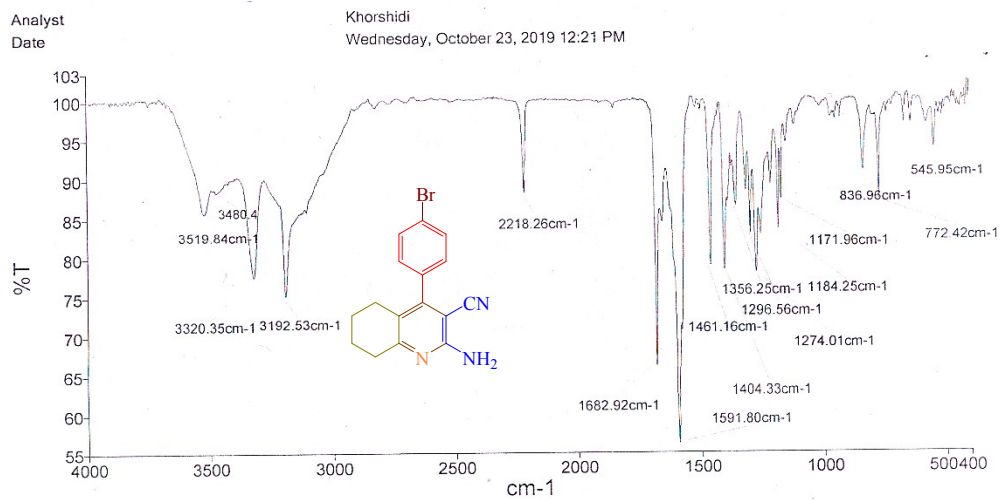

**Fig S38.** <sup>1</sup>H NMR spectrum of 2-amino-4-(4-bromophenyl)-5,6,7,8-tetrahydroquinoline-3-carbonitrile (**8e**)

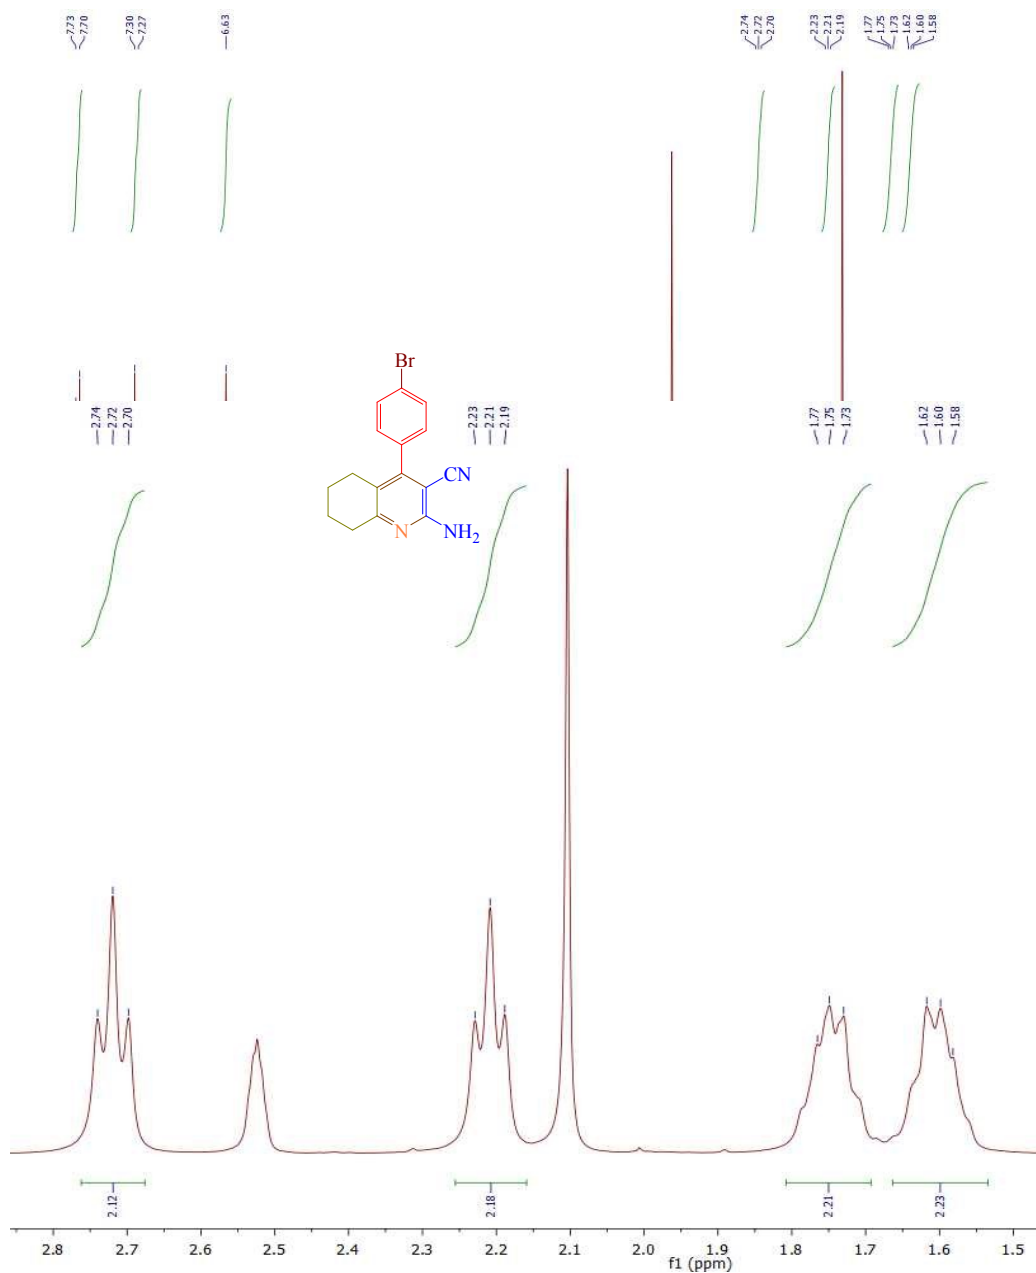

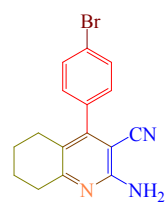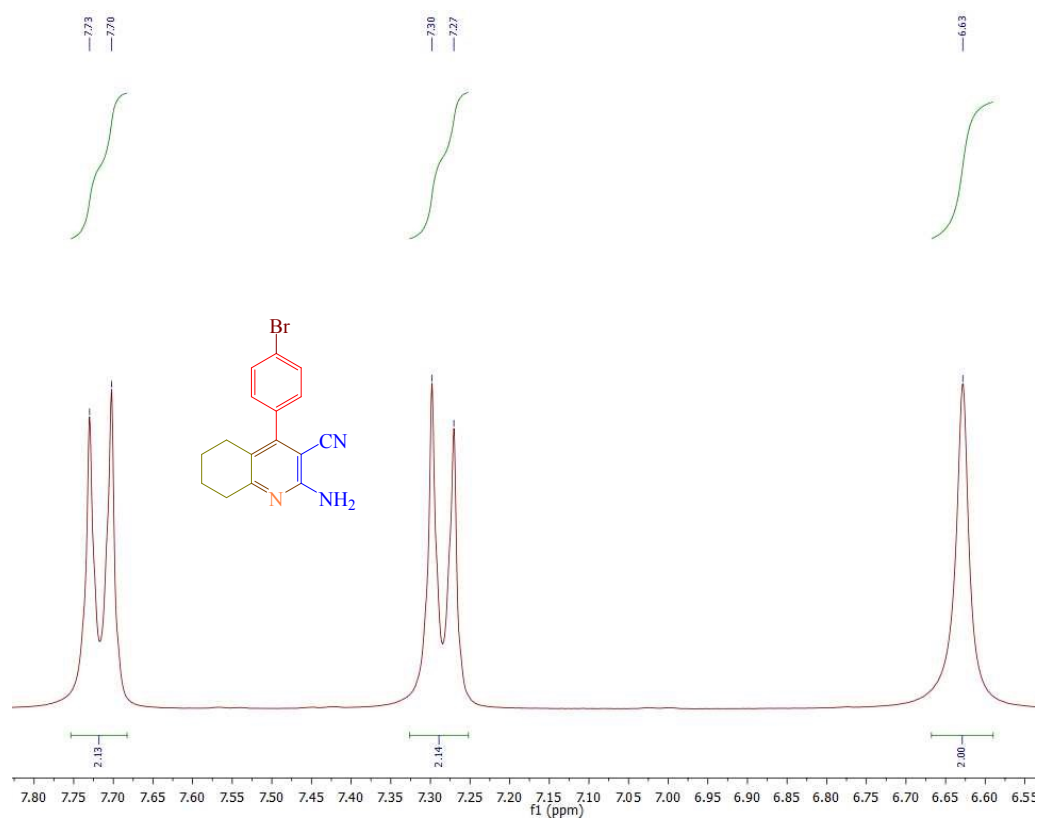

**Fig. S39.** <sup>13</sup>C NMR spectrum of 2-amino-4-(4-bromophenyl)-5,6,7,8-tetrahydroquinoline-3-carbonitrile (8e)

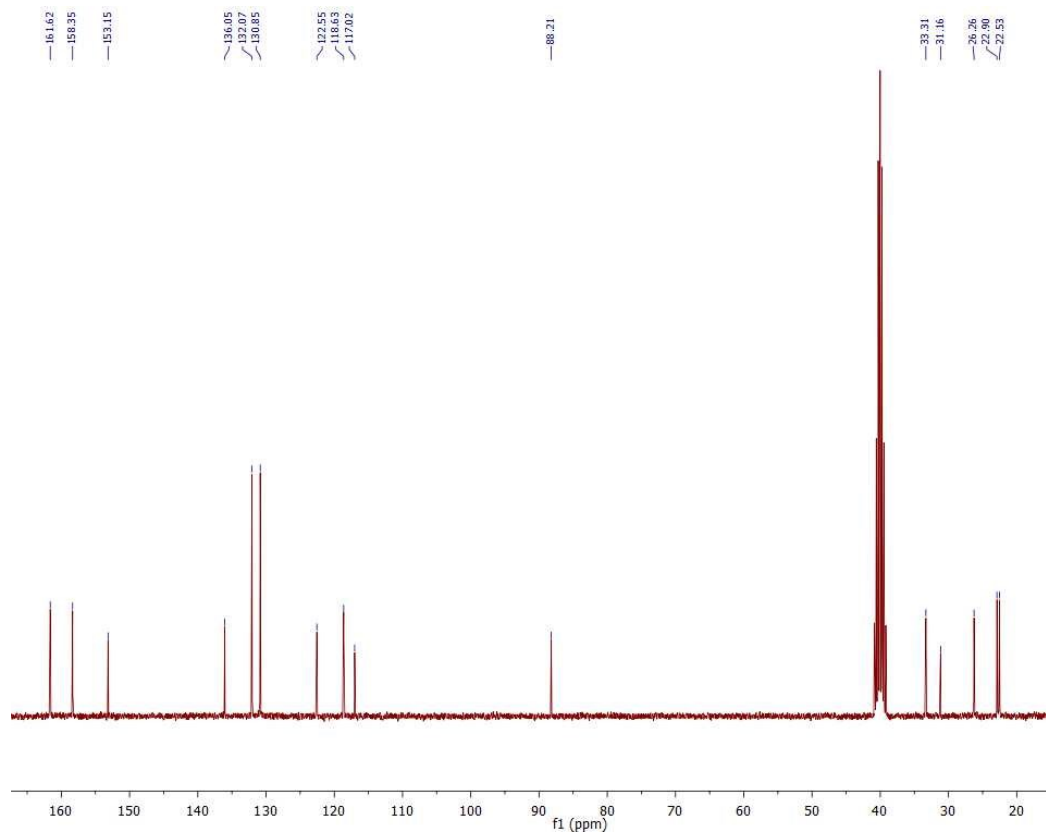

Fig. S40. FT-IR spectrum of 2-amino-4-(thiophen-2-yl)-5,6,7,8-tetrahydroquinoline-3-carbonitrile (8f)

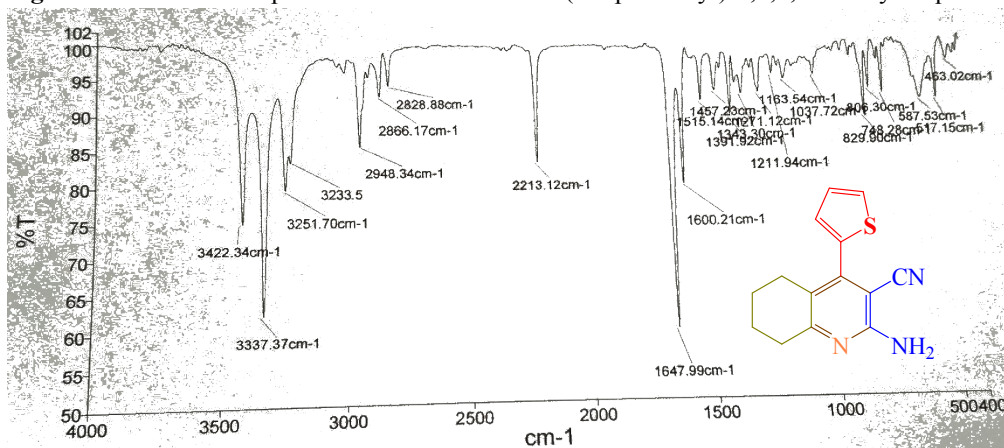

Fig. S41. <sup>1</sup>H NMR spectrum of 2-amino-4-(thiophen-2-yl)-5,6,7,8-tetrahydroquinoline-3-carbonitrile (8f)

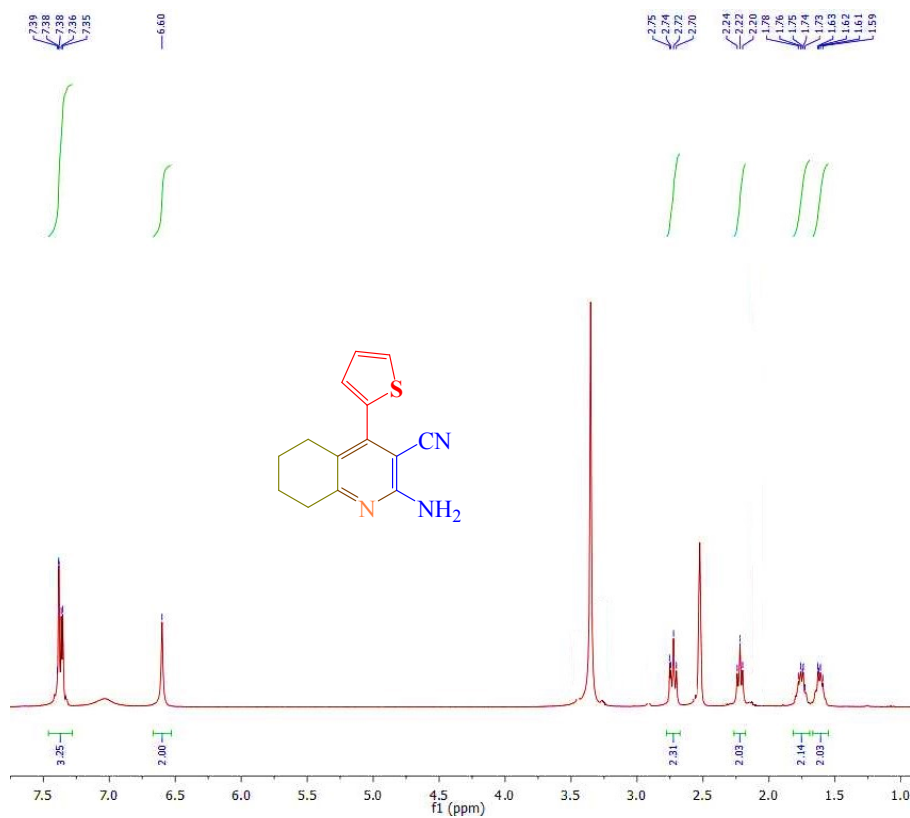

Fig. S42. <sup>13</sup>C NMR spectrum of 2-amino-4-(thiophen-2-yl)-5,6,7,8-tetrahydroquinoline-3-carbonitrile (8f)

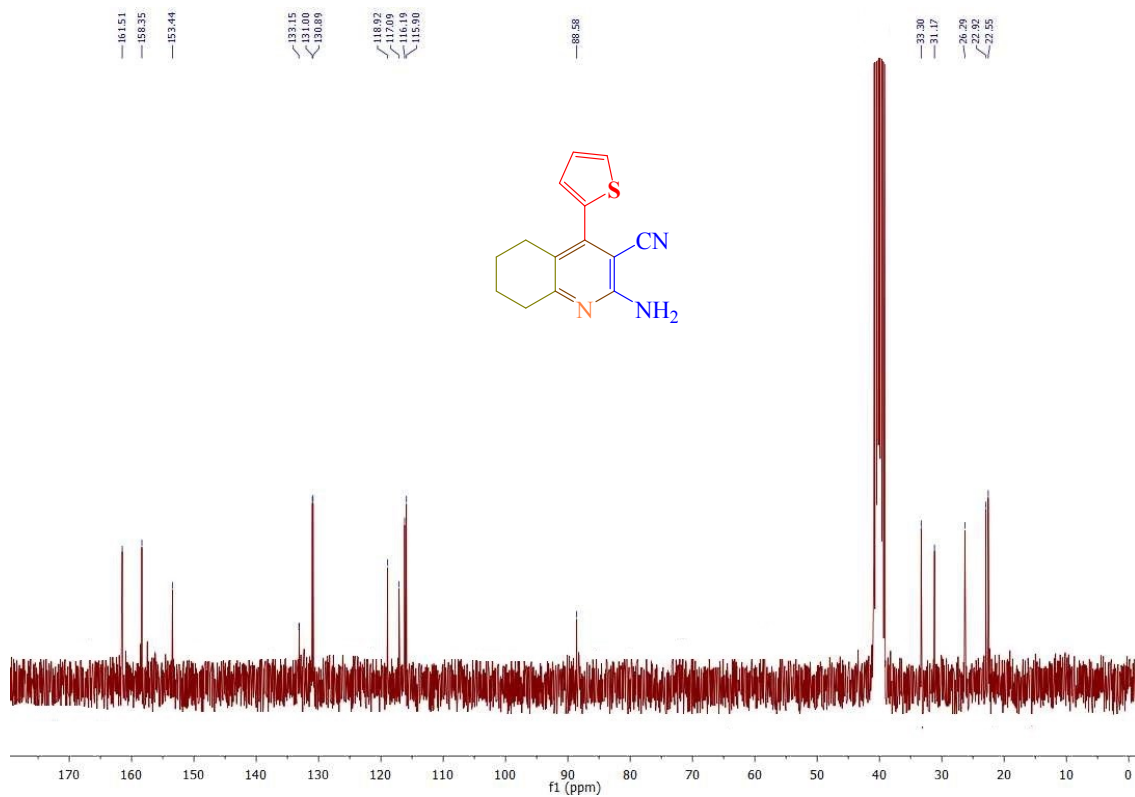

Supplement: d0ra02172e1.pdf [file d0ra02172e1.pdf]
